# Supplementary material for: Genomic Analyses of >3,100 Nasopharyngeal Pneumococci Revealed Significant Differences Between Pneumococci Recovered in Four Different Geographical Regions
Source: Front Microbiol. 2019 Feb 25;10:317. doi: 10.3389/fmicb.2019.00317 (PMC6398412; doi:10.3389/fmicb.2019.00317)
Supplement: TABLE S4 — Supercore genes found in all pneumococcal study genomes, plus the additional core genes shared by the Reykjavik, Southampton, and Boston pneumococci. [file Table_4.XLSX]

## Sheet: supercore genome (n=558)
Representative gene ID	Gene	eggnog hit	COG functional category	Product
25704_SMRU18_00297	gldA	04RSS,05DCT,0NERZ,COG0371	C	3-dehydroquinate synthase
25704_SMRU18_00405	fni	04RH1,06UJV,0NE2G,COG1304	C	isopentenyl-diphosphate:dimethylallyl diphosphate isomerase type 2
25704_SMRU18_00572	group_5973	04SAV,07QMW,0NDI7,COG0446	C	NADH oxidase
25704_SMRU18_00603	atpC	04V56,05KNM,0NKR5,COG0355	C	proton-translocating ATPase, F1 sector, epsilon-subunit
25704_SMRU18_00604	atpD	04RPB,05C4J,0NDAS,COG0055	C	F0F1 ATP synthase subunit beta
25704_SMRU18_00605	atpG	04RN9,05J80,0NENB,COG0224	C	proton-translocating ATPase, F1 sector, gamma-subunit
25704_SMRU18_00606	atpA	04RUE,05CDG,0NDJF,COG0056	C	ATP synthase subunit alpha
25704_SMRU18_00607	atpH	COG0712	C	proton-translocating ATPase, F1 sector, delta-subunit
25704_SMRU18_00609	atpB	COG0356	C	ATP synthase F0 subunit A
25704_SMRU18_00610	atpE	05ZA1,COG0636	C	F0F1 ATP synthase subunit C
25704_SMRU18_00615	glpO	04RR3,05C6V,0NDTT,COG0578	C	alpha-glycerophosphate oxidase
25704_SMRU18_00690	yumC	04R8Y,05CAY,0NDF5,COG0492	C	thioredoxin reductase
25704_SMRU18_00719	ppaC	04R9V,05E2M,0NDGS,COG1227	C	manganese-dependent inorganic pyrophosphatase
25704_SMRU18_01236	nifU	04V0I,08UNV,0NJAM,COG0822	C	nifU family protein
25704_SMRU18_01328	ldhA	04RY3,05C80,0NDU7,COG0039	C	L-lactate dehydrogenase 1
25704_SMRU18_01563	mvaA	04RH0,07EEU,0NDYQ,COG1257	C	3-hydroxy-3-methylglutaryl-coenzyme a reductase
25704_SMRU18_01605	gpdA	04R5Z,05CSF,0NE56,COG0240	C	glycerol-3-phosphate dehydrogenase (NAD(P)+)
25704_SMRU18_01657	pta	08IJ2,COG0280	C	phosphotransacetylase
25704_SMRU18_01673	gapN	04R5M,05C26,0NDDA,COG1012	C	NADP-dependent glyceraldehyde-3-phosphate dehydrogenase
25704_SMRU18_00037	group_7400	04XMZ,068V5,0NR9A,COG2919	D	cell division protein
25704_SMRU18_00095	ftsE_2	04RU5,05CAK,0NDGB,COG2884	D	cell division ATP-binding protein FtsE
25704_SMRU18_00096	ftsX	04RH5,05CRP,0NDDW,COG2177	D	cell division ABC transporter permease FtsX
25704_SMRU18_00844	ftsW	04STN,05CNI,0NDTA,COG0772	D	cell division protein FtsW
25704_SMRU18_01227	ftsK_2	04RU2,05CNU,0NE2A,COG1674	D	DNA translocase, cell division protein
25704_SMRU18_01504	ftsZ	04RCR,05CDK,0ND68,COG0206	D	cell division protein FtsZ
25704_SMRU18_01505	ftsA	04RGU,05CIT,0NDZW,COG0849	D	cell division protein FtsA
25704_SMRU18_01637	rodA	04RF2,05CNI,0NDMX,COG0772	D	RodA
25704_SMRU18_01641	ezrA	04S98,05DGY,0NE4B,COG4477	D	septation ring formation regulator EzrA
25704_SMRU18_00091	lptB_2	04T1Q,05C0Z,0NDGK,COG0411	E	putative branched-chain amino acid transport protein
25704_SMRU18_00429	group_2932	04X4B,068E8,0NR0I,COG1605	E	chorismate mutase/prephenate dehydratase
25704_SMRU18_00463	hom	04RMT,05D6E,0NDBI,COG0460	E	homoserine dehydrogenase
25704_SMRU18_00473	aroA	04SNT,05CMY,0NDHG,COG0128	E	5-enolpyruvylshikimate-3-phosphate synthase
25704_SMRU18_00475	tyrC	04S4Q,05EVN,0ND6B,COG0287	E	prephenate dehydrogenase
25704_SMRU18_00476	aroC	04RQZ,05D10,0NDXX,COG0082	E	chorismate synthase, (5-enolpyruvylshikimate-3-phosphate phospholyase)
25704_SMRU18_00478	aroE	04TQX,05E2X,0NDG1,COG0169	E	shikimate 5-dehydrogenase
25704_SMRU18_00479	aroD	04TV3,05FF2,0NERN,COG0710	E	3-dehydroquinate dehydratase, (3-dehydroquinase) (type I DHQase)
25704_SMRU18_00563	tcyN	04SC3,05CDA,0ND9H,COG1126	E	aspartate/glutamate ABC transporter ATP-binding protein
25704_SMRU18_00564	yxeN	04UFI,05JFS,0NJY4,11RN5	E	aspartate/glutamate ABC transporter permease
25704_SMRU18_00598	glnQ_2	04TG4,08KCS,0NH0B,COG1126	E	amino acid ABC transporter ATP-binding protein
25704_SMRU18_00696	dapB	04RQY,05DUK,0NDK8,COG0289	E	dihydrodipicolinate reductase
25704_SMRU18_00709	group_3981	04S32,05CHM,0ND77,COG0436	E	aspartate/tyrosine/aromatic aminotransferase
25704_SMRU18_00755	metF	04TW6,05SYT,0NEI9,COG0685	E	5,10-methylenetetrahydrofolate reductase
25704_SMRU18_00756	metE	04SAY,07QYE,0NE3R,COG0620	E	5- methyltetrahydropteroyltriglutamate/homocysteine S-methyltransferase
25704_SMRU18_00826	aspC1	04RUU,05CHM,0ND77,COG0436	E	aspartate aminotransferase
25704_SMRU18_00947	thrA	04RJ2,05CFH,0NDN4,COG0527	E	aspartate kinase
25704_SMRU18_00953	group_6950	04RB9,05BZG,0ND97,COG1115	E	Na+/alanine symporter
25704_SMRU18_00968	amiA	04U4K,05DIB,0NEHC,COG4166	E	oligopeptide-binding protein AmiA
25704_SMRU18_00972	amiF	054W1,08JQ7,0P6PV,COG4608	E	oligopeptide ABC transporter ATP-binding protein AmiF
25704_SMRU18_01042	trpF	04V3X,08ZGB,0NJ9K,COG0135	E	N-(5'-phosphoribosyl)anthranilate isomerase
25704_SMRU18_01043	trpB	04RBF,05CG0,0NDCS,COG0133	E	tryptophan synthase, beta subunit
25704_SMRU18_01044	trpA	04U1R,05F6H,0NE8C,COG0159	E	tryptophan synthase subunit alpha
25704_SMRU18_01149	lysA_1	04S1H,05CU5,0NDJD,COG0019	E	diaminopimelate decarboxylase
25704_SMRU18_01167	glnA	04R82,05C5F,0NDW2,COG0174	E	glutamate-ammonia ligase
25704_SMRU18_01279	brnQ	04TA4,05CWM,0NE1X,COG1114	E	branched-chain amino acid transport system II carrier protein
25704_SMRU18_01282	pepV	04RFK,07QSE,0NDIS,COG0624	E	peptidase M20 superfamily
25704_SMRU18_01348	artM_1	04R6M,05CDA,0ND9H,COG1126	E	phosphate ABC transporter ATP-binding protein
25704_SMRU18_01375	idnD	04ST6,05EJJ,0NESW,COG1063	E	zinc-containing alcohol dehydrogenase
25704_SMRU18_01631	pepN	04RHY,05CD8,0NF46,COG0308	E	aminopeptidase N
25704_SMRU18_01791	ilvH	04UP0,08ZP8,0NIX4,COG0440	E	acetolactate synthase 3 regulatory subunit
25704_SMRU18_01797	group_8206	04RDC,05CDA,0ND9H,COG1126	E	ABC transporter ATP-binding protein
25704_SMRU18_01798	yecS_1	04SD3,05E5Q,0NDPN,COG0765,COG0834	E	ABC transporter-amino acid transport; amino acid-binding protein/permease protein
25704_SMRU18_01863	asd	04RI2,05CM3,0NDEF,COG0136	E	aspartate-semialdehyde dehydrogenase
25704_SMRU18_01918	cysK	04RXM,05C6T,0NDXP,COG0031	E	cysteine synthase
25704_SMRU18_01988	proC	04V4K,05II7,0NEQE,COG0345	E	pyrroline-5-carboxylate reductase
25704_SMRU18_01989	proA	04Z4W,05C2S,0NDVW,COG0014	E	gamma-glutamyl phosphate reductase
25704_SMRU18_02000	lysA_2	04SVV,05D3D,0NDYU,COG0019	E	LysA-like decarboxylase, diaminopimelate decarboxylase putative
25704_SMRU18_02001	group_4340	04SF0,05E3Q,0NDGD,COG1748	E	dehydrogenase family protein, saccharopine dehydrogenase
25704_SMRU18_02002	speE	04S05,05CCX,0NDIT,COG0421	E	spermidine synthase
25704_SMRU18_02007	pepQ	04RJX,05DC7,0NEMI,COG0006	E	X-Pro dipeptidase
25704_SMRU18_00085	upp	04RAB,05CZ5,0NEBX,COG0035	F	uracil phosphoribosyltransferase
25704_SMRU18_00680	gmk	04SFI,08UHA,0NEG2,COG0194	F	guanylate kinase
25704_SMRU18_01173	pyrG	04R67,05C8D,0NDN2,COG0504	F	CTP synthetase
25704_SMRU18_01265	pyrC	04RBX,05CD3,0NDCU,COG0044	F	dihydroorotase
25704_SMRU18_01318	udk	04RCT,05DBI,0NDVQ,COG0572	F	uridine kinase
25704_SMRU18_01381	carA	04RQB,05C1M,0ND85,COG0505	F	carbamoyl-phosphate synthase, small subunit
25704_SMRU18_01382	pyrB	04R55,05CXT,0NDPX,COG0540	F	aspartate carbamoyltransferase
25704_SMRU18_01383	pyrR	04UAT,08UK1,0NI48,COG2065	F	transcriptional attenuation of the pyrimidine operon/uracil phosphoribosyltransferase (bifunctional protein)
25704_SMRU18_01392	cdd	04VV9,05KG3,0NKS3,COG0295	F	cytidine deaminase
25704_SMRU18_01464	cmk	04TZF,05CAT,0NI76,COG0283	F	cytidylate kinase
25704_SMRU18_01622	prsA_1	04RRU,05C5T,0NDMJ,COG0462	F	ribose-phosphate pyrophosphokinase
25704_SMRU18_01642	purA	04R9P,05C91,0NDAX,COG0104	F	adenylosuccinate synthetase
25704_SMRU18_01763	nrdE	04RVU,05BZH,0NDYT,COG0209	F	ribonucleoside-diphosphate reductase, alpha subunit
25704_SMRU18_01942	pfs	04TSA,05DUF,0NHE2,COG0775	F	5'-methylthioadenosine nucleosidase/S-adenosylhomocysteine nucleosidase
25704_SMRU18_01982	pyrH	04RV9,05C41,0NDC1,COG0528	F	uridylate kinase
25704_SMRU18_01987	tmk	04TT4,08ZMD,0NH9J,COG0125	F	thymidylate kinase
25704_SMRU18_02018	apt	04TQM,09003,0NH90,COG0503	F	adenine phosphoribosyltransferase
25704_SMRU18_02109	pyrE	04TPD,065E1,0NH7S,COG0461	F	orotate phosphoribosyltransferase
25704_SMRU18_02110	pyrF	04SGV,06EG9,0NHAB,COG0284	F	orotidine-5-phosphate decarboxylase
25704_SMRU18_02131	thyA	04RKI,05C0V,0NDVA,COG0207	F	thymidylate synthase
25704_SMRU18_01099	hit	04UV1,05K59,0NKNV,COG0537	F	protein hit
25704_SMRU18_00292	chbA	COG1447	G	PTS system sugar-specific transporter subunit EIIA
25704_SMRU18_00293	gmuB	04VW2,05VZJ,0NNIH,COG1440	G	PTS system sugar-specific transporter subunit EIIB
25704_SMRU18_00296	fsaA	04V8J,05CW3,0ND7S,COG0176	G	fructose-6-phosphate aldolase
25704_SMRU18_00323	manY	04RRC,05ETZ,0NDG0,COG3715	G	PTS system mannose-specific transporter subunit IIC
25704_SMRU18_00367	dexB	04RBT,05CG3,0NE22,COG0366	G	glucan 1,6-alpha-glucosidase
25704_SMRU18_00395	cbpJ_1	04RRS,05C7Q,0NDMG,COG0362	G	choline binding protein J
25704_SMRU18_00590	gla	COG0580	G	glycerol facilitator-aquaporin
25704_SMRU18_00595	pgmA	04R6Y,07QSU,0NDS0,COG1109	G	phosphoglucomutase
25704_SMRU18_00693	glmM	04R52,07QJF,0ND9S,COG1109	G	phosphoglucosamine mutase
25704_SMRU18_01155	rsgA	04RQN,05E06,0NEC1,COG1162	G	ribosome-associated GTPase
25704_SMRU18_01170	pgk	04RAA,05BZA,0ND8W,COG0126	G	phosphoglycerate kinase
25704_SMRU18_01206	pyk	04RN8,05CA9,0NDN8,COG0469	G	pyruvate kinase
25704_SMRU18_01207	pfkA	04RR8,05CTQ,0NDK9,COG0205	G	6-phosphofructokinase
25704_SMRU18_01298	fbaA	04S7Y,05D2N,0NDKF,COG0191	G	fructose-bisphosphate aldolase
25704_SMRU18_01349	zwf	04R9K,05D8W,0ND8G,COG0364	G	glucose-6-phosphate 1-dehydrogenase
25704_SMRU18_01406	deoB	04R6S,05CZG,0NED4,COG1015	G	phosphopentomutase
25704_SMRU18_01407	rpiA	04T1S,05E66,0ND7Z,COG0120	G	ribose-5-phosphate isomerase A
25704_SMRU18_01493	gpmA_1	04SQ2,05DKJ,0NEIM,COG0588	G	phosphoglyceromutase
25704_SMRU18_01520	yesO_1	04VTV,077N6,0NE8K,COG1653	G	ABC transporter, sugar transporter, sugar binding lipoprotein-N-acetylneuraminate-binding protein
25704_SMRU18_01561	scrB	054GC,08HKT,0P5XZ,COG1621	G	glycosyl hydrolases family 32
25704_SMRU18_01752	gpi	04RWH,07QYV,0NDSD,COG0166	G	glucose-6-phosphate isomerase
25704_SMRU18_01761	ptsH	04VPC,05KRI,0NM3E,COG1925	G	Phosphotransferase system, phosphocarrier protein HPr
25704_SMRU18_01843	gapA	04R87,05C17,0ND79,COG0057	G	glyceraldehyde-3-phosphate dehydrogenase
25704_SMRU18_02016	ugpC	054MZ,08IJ9,0P69C,COG3839	G	sugar ABC transporter ATP-binding protein
25704_SMRU18_02132	glcK	04RQH,05DKQ,0NFG2,COG1940	G	glucokinase
25704_SMRU18_00100	metK	04RN6,05CPH,0NDMW,COG0192	H	S-adenosylmethionine synthetase
25704_SMRU18_00236	folC	04RGX,05DPM,0NE97,COG0285	H	dihydrofolate synthetase
25704_SMRU18_00330	sulB	04RGX,05DPM,0NE97,COG0285	H	dihydrofolate synthetase
25704_SMRU18_00331	sulC	04T2M,05EUJ,0NEW7,COG0302	H	GTP cyclohydrolase
25704_SMRU18_00332	sulD	04UMK,05K8U,0NKQX,COG0801,COG1539	H	bifunctional folate synthesis protein
25704_SMRU18_00371	ribE	04TW5,08R6K,0NHAM,COG0307	H	riboflavin synthase subunit alpha
25704_SMRU18_00527	hemN	04R5R,05CSA,0ND4T,COG0635	H	Coproporphyrinogen III oxidase, oxygen-independent coproporphyrinogen III oxidase
25704_SMRU18_00538	nadE	04RXI,07RA1,0NDT9,COG0171	H	NAD+ synthetase
25704_SMRU18_00539	pncB	04R5S,05DAP,0ND56,COG1488	H	nicotinate phosphoribosyltransferase
25704_SMRU18_00570	pdxT	04TQY,08UHX,0NIB2,COG0311	H	glutamine amidotransferase subunit PdxT
25704_SMRU18_00571	pdx1	04RJ7,05CD9,0NDAZ,COG0214	H	pyridoxal biosynthesis lyase PdxS
25704_SMRU18_00671	nadD	04TU0,08Z1W,0NJ7X,COG1057	H	putative nicotinate-nucleotide adenylyltransferase
25704_SMRU18_00672	group_3164	04U9M,08WF2,0NJ77,COG1713	H	phosphohydrolase
25704_SMRU18_00960	birA	04UHS,05HJX,0NDXC,COG0340,COG1654	H	bifunctional protein, biotin operon repressor; biotin--[acetyl-CoA-carboxylase] synthetase
25704_SMRU18_01153	thiN	04V27,05FJ0,0NJAX,COG1564	H	thiamine pyrophosphokinase
25704_SMRU18_01409	folD	04S47,05CN0,0NDQA,COG0190	H	FolD bifunctional protein; includes: methylenetetrahydrofolate dehydrogenase, methenyltetrahydrofolate cyclohydrolase
25704_SMRU18_01740	dltC	04WGH,05X96,0NNU1,COG0236	H	D-alanyl carrier protein DCP
25704_SMRU18_01960	coaE	04UUQ,08ZQD,0NJ9S,COG0237	H	dephospho-CoA kinase
25704_SMRU18_00009	pgsA	04TUJ,05BZQ,0NJ7B,COG0558	I	phosphatidylglycerophosphate synthase
25704_SMRU18_00179	plsC	04UYM,05F6E,0NK47,COG0204	I	acyltransferase family protein
25704_SMRU18_00304	uppS	04RYY,05CR3,0NDXK,COG0020	I	undecaprenyl pyrophosphate synthase
25704_SMRU18_00305	cdsA	04UPT,05KNE,0NJ2Q,COG0575	I	phosphatidate cytidylyltransferase
25704_SMRU18_00402	galK_2	04TT1,08UJR,0NHMC,COG1577	I	mevalonate kinase
25704_SMRU18_00403	mvd1	04S26,060Q7,0NF9G,COG3407	I	diphosphomevalonate decarboxylase
25704_SMRU18_00404	group_2498	04RP1,05DU8,0NEU4,COG1577	I	phosphomevalonate kinase
25704_SMRU18_00823	acpP_2	08JYS,0NS55,COG0236	I	acyl carrier protein
25704_SMRU18_00824	plsX	04RCZ,05C6B,0NDEQ,COG0416	I	fatty acid/phospholipid synthesis protein
25704_SMRU18_00860	oatA	04YWZ,05EVW,0NGEE,COG1835	I	acyltransferase
25704_SMRU18_00934	accA	COG0825	I	acetyl co-enzyme A carboxylase carboxyltransferase alpha subunit
25704_SMRU18_00935	accD	04R6Q,07QTG,0NDKK,COG0777	I	acetyl-CoA carboxylase beta subunit
25704_SMRU18_00936	accC	04R5A,05CER,0ND8Y,COG0439	I	acetyl-CoA carboxylase biotin carboxylase subunit
25704_SMRU18_00938	accB	04UVY,05KM4,0NNV3,COG0511	I	acetyl-CoA carboxylase
25704_SMRU18_00939	fabF	04REG,05C0Q,0NDUB,COG0304	I	3-oxoacyl-(acyl carrier protein) synthase II
25704_SMRU18_00940	fabG	04TM0,05CHR,0ND4W,0XNW1	I	3-oxoacyl-ACP reductase
25704_SMRU18_00941	fabD	04RPF,05CJF,0NDIK,COG0331	I	ACP S-malonyltransferase
25704_SMRU18_00943	acpP_1	04XHN,0854A,0NR31,COG0236	I	acyl carrier protein
25704_SMRU18_01564	pksG	04RWJ,05F99,0NEC2,COG3425	I	hydroxymethylglutaryl-CoA synthase
25704_SMRU18_01627	cpnA	0834J,COG1028	I	short chain dehydrogenase
25704_SMRU18_00001	tsf	04S3I,05CU7,0NDYP,COG0264	J	elongation factor Ts
25704_SMRU18_00002	rpsB	04RJ8,05CE9,0NDKJ,COG0052	J	30S ribosomal protein S2
25704_SMRU18_00016	trpS	04RUJ,05C31,0NDQ4,COG0180	J	tryptophanyl-tRNA synthetase
25704_SMRU18_00033	engD	04RND,05C3G,0ND9U,COG0012	J	GTP-dependent nucleic acid-binding protein EngD
25704_SMRU18_00173	thrS	04RD7,05C22,0NDVB,COG0441	J	threonyl-tRNA synthetase
25704_SMRU18_00177	rpsO_1	04VMQ,05K77,0NKMX,COG0184	J	30S ribosomal protein S15
25704_SMRU18_00245	rpsJ	04UUJ,08Z10,0NJ6Y,COG0051	J	ribosomal protein S10
25704_SMRU18_00246	rplC	04RQJ,05EEE,0NDJY,COG0087	J	LSU ribosomal protein L3p (L3e)
25704_SMRU18_00249	rplB	04S8K,05CFD,0NDSP,COG0090	J	50S ribosomal protein L2
25704_SMRU18_00251	rplV	04UV2,05KAP,0NJ7J,COG0091	J	50S ribosomal protein L22
25704_SMRU18_00252	rpsC	04RTG,05CKE,0NDQG,COG0092	J	SSU ribosomal protein S3p (S3e)
25704_SMRU18_00253	rplP	04TPZ,08R70,0NH5I,COG0197	J	LSU ribosomal protein L16p (L10e)
25704_SMRU18_00254	rpmC	04WNJ,082SA,0NNMP,COG0255	J	50S ribosomal protein L29
25704_SMRU18_00256	rplN	04U7Z,08UNN,0NI2N,COG0093	J	LSU ribosomal protein L14p (L23e)
25704_SMRU18_00257	rplX	04VNU,05KAR,0NKNA,COG0198	J	50S ribosomal protein L24
25704_SMRU18_00258	rplE	04RT5,05CW6,0NEFD,COG0094	J	LSU ribosomal protein L5p (L11e)
25704_SMRU18_00260	rpsH	04U81,08UJY,0NI44,COG0096	J	30S ribosomal protein S8
25704_SMRU18_00261	rplF	04TPF,08R5J,0NH5K,COG0097	J	50S ribosomal protein L6
25704_SMRU18_00263	rpsE	04TQU,08RA9,0NH6D,COG0098	J	SSU ribosomal protein S5p (S2e)
25704_SMRU18_00264	rpmD	04WK2,05VPB,0NNRD,COG1841	J	50S ribosomal protein L30
25704_SMRU18_00265	rplO	04TXB,08UZ0,0NI2G,COG0200	J	50S ribosomal protein L15
25704_SMRU18_00270	rpsM	04UCT,08Z04,0NJE3,COG0099	J	SSU ribosomal protein S13p (S18e)
25704_SMRU18_00271	rpsK	04U6Y,08UHH,0NI3B,COG0100	J	SSU ribosomal protein S11p (S14e)
25704_SMRU18_00273	rplQ	04UUM,08ZT0,0NJG8,COG0203	J	LSU ribosomal protein L17p
25704_SMRU18_00298	leuS	04RBG,05C8T,0NDFS,COG0495	J	leucyl-tRNA synthetase
25704_SMRU18_00307	proS	04RHJ,05C90,0NDJA,COG0442	J	prolyl-tRNA synthetase
25704_SMRU18_00312	rpsL	04TTG,08UKE,0NH73,COG0048	J	SSU ribosomal protein S12p (S23e)
25704_SMRU18_00313	rpsG	04TTF,08UHY,0NH7R,COG0049	J	30S ribosomal protein S7
25704_SMRU18_00314	fusA	04RGT,05CEJ,0ND9K,COG0480	J	elongation factor G
25704_SMRU18_00336	rpsI	04U9B,08UJD,0NI53,COG0103	J	SSU ribosomal protein S9p (S16e)
25704_SMRU18_00520	rsmF	04R5N,05CYJ,0NDKH,COG0144,COG3270	J	NOL1/NOP2/sun family protein
25704_SMRU18_00532	rpsU	04WG2,05VCC,0NNJD,COG0828	J	30S ribosomal protein S21
25704_SMRU18_00537	ydaF_3	04V6M,0907C,0NHBY,COG1670	J	GNAT family acetyltransferase
25704_SMRU18_00559	def_2	04U0Y,07YB9,0NHGS,COG0242	J	peptide deformylase
25704_SMRU18_00560	group_8075	04R6B,05C2N,0ND5P,COG0566	J	TrmH family RNA methyltransferase group 3
25704_SMRU18_00577	glyS	04RPY,05C38,0NDNH,COG0751	J	glycyl-tRNA synthetase beta subunit
25704_SMRU18_00578	glyQ	054GJ,08HMW,0P5YD,COG0752	J	glycyl-tRNA synthetase alpha subunit
25704_SMRU18_00611	dus	04RJH,05CEH,0ND84,COG0042	J	NifR3 family TIM-barrel protein
25704_SMRU18_00622	efp	04RMK,05DRH,0NECN,COG0231	J	Translation elongation factor P
25704_SMRU18_00624	gatB	04S2C,05CHT,0NDP3,COG0064	J	glutamyl tRNA-Gln amidotransferase chain B
25704_SMRU18_00670	yhbY	04X4Q,0812S,0NNGP,COG1534	J	ancient RNA-binding IF3-C fold protein
25704_SMRU18_00683	fmt	04RQ4,05CAE,0NDJR,COG0223	J	methionyl-tRNA formyltransferase
25704_SMRU18_00711	asnC	04RH9,05C5S,0NDUQ,COG0017	J	asparaginyl-tRNA synthetase
25704_SMRU18_00714	rpsR	04VJ7,05VH8,0NNM4,COG0238	J	SSU ribosomal protein S18p @ SSU ribosomal protein S18p, zinc-independent
25704_SMRU18_00716	yugI	04X6D,060GV,0NNXF,COG1098	J	RNA binding protein
25704_SMRU18_00760	pheT_2	04RZD,05C6A,0ND9D,COG0072,COG0073	J	phenylalanyl-tRNA synthetase, beta chain
25704_SMRU18_00762	pheS	04RJG,05CSS,0NDGC,COG0016	J	phenylalanyl-tRNA synthetase, alpha chain
25704_SMRU18_00875	rnpA	04VV3,05M7T,0NKU3,COG0594	J	ribonuclease P
25704_SMRU18_00950	serS	04RAY,05CGR,0NDEG,COG0172	J	seryl-tRNA synthetase
25704_SMRU18_01077	prmA	04RGF,05F59,0NDS7,COG2264	J	ribosomal protein methyltransferase
25704_SMRU18_01156	ksgA	04R8M,05D1X,0NE67,COG0030	J	dimethyladenosine transferase
25704_SMRU18_01250	argS	04S1B,05C75,0NDAY,COG0018	J	arginyl-tRNA synthetase(arginine--tRNA ligase) (ARGRS)
25704_SMRU18_01274	rl1	04REW,05C64,0NDC7,COG0081	J	50S ribosomal protein L1
25704_SMRU18_01275	rplK	04TQ1,08UIK,0NH65,COG0080	J	50S ribosomal protein L11
25704_SMRU18_01307	group_6502	04S35,05EVI,0NEB1,COG3557	J	UPF0374 protein SSU05
25704_SMRU18_01314	tlyA	04RGH,05DX0,0NDSW,COG1189	J	rRNA methylase
25704_SMRU18_01395	rsmC	04UBQ,07Y49,0NICX,COG2813	J	16S RNA G1207 methylase RsmC
25704_SMRU18_01398	rpsT	04WHR,05KQV,0NNG0,COG0268	J	putative 30S ribosomal protein S20
25704_SMRU18_01444	hisS	04RR5,05CUT,0NE11,COG0124	J	histidyl-tRNA synthetase
25704_SMRU18_01497	ileRS	04R7I,05C07,0ND6T,COG0060	J	isoleucyl-tRNA synthetase
25704_SMRU18_01661	rplU	04VF0,05KK9,0NKSY,COG0261	J	50S ribosomal protein L21
25704_SMRU18_01662	group_8195	04WKJ,05X36,0NNMY,COG2868	J	ribosomal protein
25704_SMRU18_01663	rpmA	04UXG,05K46,0NKTD,COG0211	J	LSU ribosomal protein L27p
25704_SMRU18_01696	rpsP_2	04VJN,05K5M,0NKN5,COG0228	J	30S ribosomal protein S16
25704_SMRU18_01705	map	04RB7,05CA1,0NDAT,COG0024	J	methionyl aminopeptidase
25704_SMRU18_01753	gltX	04S5T,05C20,0NDF1,COG0008	J	nondiscriminating glutamyl-tRNA synthetase
25704_SMRU18_01784	gatC_1	04WGV,05VB5,0NNG3,COG0721	J	aspartyl/glutamyl-tRNA amidotransferase subunit C
25704_SMRU18_01785	prfC	04R83,05C8A,0NE61,COG4108	J	regulator of gtfB
25704_SMRU18_01787	rpmB	04WK4,05VB9,0NNJP,COG0227	J	LSU ribosomal protein L28p
25704_SMRU18_01829	group_6087	04WID,05VHM,0NNMH,COG1358	J	L7A family ribosomal protein
25704_SMRU18_01842	truC	04TBI,08YBP,0NFYP,COG0564	J	ribosomal large subunit pseudouridine synthase, RluD subfamily protein
25704_SMRU18_01889	rpsD	04RD0,05G6W,0ND8R,COG0522	J	30S ribosomal protein S4
25704_SMRU18_01912	rplI	04VFX,05K9Q,0NKRK,COG0359	J	50S ribosomal protein L9
25704_SMRU18_01914	group_12109	05MS2,0NI2S,COG1544	J	ribosome-associated protein
25704_SMRU18_01937	rpsA	04R8X,05CAV,0NDYX,COG0539	J	30S ribosomal protein S1
25704_SMRU18_01970	rplT	04UVI,08YZX,0NJ9F,COG0292	J	LSU ribosomal protein L20p
25704_SMRU18_01971	rpmI	04WXB,05VJV,0NNJ2,COG0291	J	LSU ribosomal protein L35p
25704_SMRU18_01981	frr	04TQ2,08VCV,0NH5V,COG0233	J	ribosome-recycling factor
25704_SMRU18_01992	rluD	04RAX,05C34,0NDX5,COG0564	J	23S rluA family pseudouridine synthase
25704_SMRU18_02028	tdcF	04VUX,05KME,0NJ7U,COG0251	J	endoribonuclease L-PSP
25704_SMRU18_02098	lysS	04RBS,05CRK,0NDNG,COG1190	J	lysyl-tRNA synthetase
25704_SMRU18_02129	miaA	04S8A,05DKX,0NE19,COG0324	J	tRNA delta(2)-isopentenylpyrophosphate transferase
25704_SMRU18_00029	parB	04RGJ,05FA0,0NDJP,COG1475	K	chromosome partitioning protein
25704_SMRU18_00083	ethR	04XXJ,067YN,0NRAF,COG1309	K	transcriptional regulator
25704_SMRU18_00168	ywnA	04WA8,08Z40,0NJDU,COG1959	K	RRF2 family protein
25704_SMRU18_00272	rpoA	04REE,05CTF,0NDG7,COG0202	K	DNA-directed RNA polymerase subunit alpha
25704_SMRU18_00359	group_6879	COG1476	K	transcriptional regulator
25704_SMRU18_00420	group_6356	04VNB,05VBN,0NNMD,COG2739	K	transcriptional regulator
25704_SMRU18_00511	yjiR	04RKZ,05C1I,0NEEH,COG1167	K	transcriptional regulator
25704_SMRU18_00523	spxA_2	04V4S,090SU,0NJN3,COG1393	K	regulatory protein Spx
25704_SMRU18_00551	yvoA_2	04SJ3,05FDP,0NEHV,COG2188	K	GntR family transcriptional regulator
25704_SMRU18_00620	nusB	04VM9,05M7K,0NNWX,COG0781	K	transcription antitermination protein NusB
25704_SMRU18_00681	rpoZ	04WMY,05ZAD,0NPEQ,COG1758	K	DNA-dependent RNA Polymerase, omega subunit
25704_SMRU18_00738	greA	04U76,08UKH,0NJC5,COG0782	K	transcription elongation factor GreA
25704_SMRU18_01105	hrcA	04R5T,05CI8,0NDQT,COG1420	K	heat-inducible transcription repressor
25704_SMRU18_01121	brpA	04R4Z,08KGH,0NFY1,COG1316	K	regulator of lytrabc operon
25704_SMRU18_01122	group_5122	04WJH,05WCN,0NPGS,COG0454	K	GNAT family acetyltransferase
25704_SMRU18_01131	rpoC	04RSR,05D27,0NE1B,COG0086	K	DNA-directed RNA polymerase subunit beta'
25704_SMRU18_01132	rpoB	054MH,08IIJ,0P68T,COG0085	K	DNA-directed RNA polymerase subunit beta
25704_SMRU18_01150	purR	04RH7,05DFT,0NEA0,COG0503	K	repressor of purine biosynthetic genes
25704_SMRU18_01174	rpoE	04UUS,08Z1Y,0NJBJ,COG3343	K	DNA-dependent RNA Polymerase, delta subunit (RNAP delta factor)
25704_SMRU18_01251	argR2	04W5H,05XBY,0NM5N,COG1438	K	arginine repressor
25704_SMRU18_01313	ahrC	04VJE,05XBY,0NIGX,COG1438	K	transcriptional repressor protein
25704_SMRU18_01354	rnc	04RYC,08ZBM,0NIEK,COG0571	K	ribonuclease III
25704_SMRU18_01477	group_7020	04X7Q,05WU9,0NNUZ,COG1846	K	putative MarR-family transcriptional regulator
25704_SMRU18_01551	nrdR	04V6R,08Z11,0NI2I,COG1327	K	NrdR family transcriptional regulator
25704_SMRU18_01562	degA_2	04S1R,05ETE,0NEAA,COG1609	K	transcriptional regulator
25704_SMRU18_01623	group_11477	04WJQ,05K7K,0NNSK,COG1695	K	PadR family transcriptional regulator
25704_SMRU18_01706	group_6571	04S02,05Z7K,0NEH6,COG4109	K	DRTGG domain/CBS domain-containing protein
25704_SMRU18_01738	adcR	051DJ,067TZ,0NYB9,0XUB6	K	putative transcriptional repressor
25704_SMRU18_01830	ylxR	04VM6,05VZN,0NNIV,COG2740	K	cytosolic protein YlxR
25704_SMRU18_01831	nusA	04R8B,05CHV,0ND7T,COG0195	K	transcription elongation factor NusA
25704_SMRU18_01839	nusG	04UIX,05E5V,0NIS5,COG0250	K	transcription antitermination protein NusG
25704_SMRU18_01903	ctsR	051KJ,05KEX,0NKQT,COG4463	K	CtsR family transcriptional regulator
25704_SMRU18_01994	cysB	04U47,08S6S,0NHY3,COG0583	K	LysR family transcriptional regulator
25704_SMRU18_02013	codY	04T1V,05EUM,0NE7Q,COG4465	K	GTP-sensing transcriptional pleiotropic repressor
25704_SMRU18_02031	whiA	04RA4,05CIE,0NDR7,COG1481	K	putative sporulation transcription regulator whiA
25704_SMRU18_02082	copY	04UYA,06I73,0NKGJ,COG3682	K	transcriptional repressor
25704_SMRU18_02095	tenA_2	04YDG,05JRH,0NUDX,COG0819	K	transcriptional regulator, TENA/THI-4 family protein
25704_SMRU18_00014	recF	04R5Y,05C3X,0NDA9,COG1195	L	recombination protein recF
25704_SMRU18_00030	dnaA	04RET,05CI4,0NDJT,COG0593	L	DNA biosynthesis, initiation, binding protein
25704_SMRU18_00031	dnaN	04RGN,05CZ8,0ND7B,COG0592	L	DNA polymerase III, beta subunit
25704_SMRU18_00099	rheB	04R7X,05C1J,0NDEN,COG0513	L	ATP-dependent RNA helicase
25704_SMRU18_00117	rexA	04RGC,07R2I,0NENF,COG1074	L	ATP-dependent exoDNAse subunit beta
25704_SMRU18_00121	polA	04RG3,05C2M,0NDWK,COG0258,COG0749	L	DNA polymerase I - 3'-5' exonuclease and polymerase domains
25704_SMRU18_00234	yrrK	04U93,08Z08,0NJ78,COG0816	L	holiday junction resolvase
25704_SMRU18_00301	ruvB	04R8N,05CKJ,0NDP4,COG2255	L	Holliday junction DNA helicase RuvB
25704_SMRU18_00315	polC_2	04R5X,05DE5,0NDJW,COG2176	L	DNA polymerase III, alpha subunit
25704_SMRU18_00566	ogt	04UZS,05K85,0NI5E,COG0350	L	O6-methylguanine-DNA methyltransferase
25704_SMRU18_00586	cshA_2	04R7T,05FDU,0ND6Z,COG0513	L	ATP-dependent RNA helicase
25704_SMRU18_00682	priA	04S1S,05C25,0NDW7,COG1198	L	primosomal protein N'
25704_SMRU18_00713	ssbA	04U6Z,08UUM,0NI2T,COG0629	L	single-stranded DNA-binding protein
25704_SMRU18_00825	recO	04TQA,08SAY,0NHK6,COG1381	L	DNA repair protein RecO
25704_SMRU18_00873	group_6923	04R9G,05RCD,0NDXF,COG0827	L	adenine-specific methyltransferase
25704_SMRU18_00955	mutS2	04RKR,05C98,0ND59,COG1193	L	mismatch repair ATPase (MutS family)
25704_SMRU18_01019	exoA	04RA2,05CGK,0NDX0,COG0708	L	exodeoxyribonuclease
25704_SMRU18_01069	rarA	04RQS,05D1H,0NDR1,COG2256	L	chromosome segregation helicase, ATPase, AAA family
25704_SMRU18_01119	recA	04S4Z,05C68,0NDA0,COG0468	L	protein RecA
25704_SMRU18_01142	rsmD	04U8M,06H78,0NI4Q,COG0742	L	methyltransferase
25704_SMRU18_01163	group_6156	04U6H,05HVR,0NI27,COG1658	L	putative primase homolog
25704_SMRU18_01164	ycfH	04RIA,05F8V,0NDS5,COG0084	L	TatD family deoxyribonuclease
25704_SMRU18_01208	dnaE	04RJF,05C0B,0NDIW,COG0587	L	DNA-polymerase III alpha-chain
25704_SMRU18_01263	ung	04RS4,05D5S,0NDQF,COG0692	L	uracil-DNA glycosylase
25704_SMRU18_01264	mutX_1	04VDG,08Z4K,0NIW3,COG0494	L	Mutator mutT protein
25704_SMRU18_01292	recJ	04RA8,05C2R,0ND4M,COG0608,COG4199	L	single-stranded DNA-specific exonuclease
25704_SMRU18_01316	xseB	04XMM,067QG,0NR1N,COG1722	L	exodeoxyribonuclease VII, small subunit
25704_SMRU18_01317	xseA	04R8K,05DVS,0NDAA,COG1570	L	exodeoxyribonuclease VII large subunit
25704_SMRU18_01327	gyrA	04RKK,05C24,0NDT2,COG0188	L	DNA gyrase subunit A
25704_SMRU18_01345	uvrB	04REB,05CCW,0NDQV,COG0556	L	excinuclease ABC subunit B
25704_SMRU18_01369	topA	04R8S,05C73,0NDAG,COG0550,COG0551	L	DNA topoisomerase I
25704_SMRU18_01385	nth	04UJJ,05CSM,0NH76,COG0177	L	endonuclease III (DNA repair), DNA-(apurinic or apyrimidinic site) lyase
25704_SMRU18_01510	recR	04RKE,05F3K,0NDY5,COG0353	L	recombination protein
25704_SMRU18_01550	group_4977	COG3611	L	chromosome replication initiation protein/membrane attachment protein
25704_SMRU18_01640	gyrB	04S20,05C7D,0NDDM,COG0187	L	DNA gyrase subunit B
25704_SMRU18_01717	dnaG	04RD1,05C9G,0NDBK,COG0358	L	DNA primase
25704_SMRU18_01891	holA	04TP3,05TQK,0NHAD,COG1466	L	DNA polymerase III, delta subunit
25704_SMRU18_01911	dnaC	04S06,05CDU,0ND9M,COG0305	L	DNA replication protein DnaC
25704_SMRU18_01916	comFA	04RQF,05PTN,0NDHF,COG4098	L	helicase ComFA
25704_SMRU18_01926	parE	04R90,05C7D,0NDDM,COG0187	L	topoisomerase IV subunit B
25704_SMRU18_01928	parC	04S51,05C24,0NDFC,COG0188	L	topoisomerase IV subunit A, ParC
25704_SMRU18_01940	dnaQ	05TX7,COG0847	L	DNA polymerase III subunit epsilon
25704_SMRU18_01986	holB	04TT6,05FA2,0NH7Q,COG0470	L	DNA polymerase III, delta' subunit
25704_SMRU18_02012	cshA_1	04R9H,05C1J,0NDGQ,COG0513	L	ATP-dependent RNA helicase
25704_SMRU18_02020	dnaD	04UK9,08XZ0,0NI14,COG3935	L	DNA replication protein
25704_SMRU18_00005	mreC	04TWV,05N3I,0NGKS,COG1792	M	cell shape determining protein MreC
25704_SMRU18_00306	eep	04RQ0,05DZP,0NDB5,COG0750	M	metallo protease
25704_SMRU18_00309	glmS	04RE8,05C46,0NE55,COG0449	M	glucosamine-fructose-6-phosphate aminotransferase
25704_SMRU18_00360	mraW	04RX7,05CGJ,0NDC3,COG0275	M	S-adenosyl-methyltransferase mraW
25704_SMRU18_00362	pbpX	04RFH,05CJN,0ND4V,COG0768	M	penicillin-binding protein 2X
25704_SMRU18_00387	pbp1A	04R7W,05BZ4,0NDAH,COG0744	M	penicillin-binding protein 1A
25704_SMRU18_00417	gidB	04SC0,05D28,0NDPD,COG0357	M	16S rRNA methyltransferase GidB
25704_SMRU18_00467	hyaD	04TDJ,05K64,0NKSF,COG0463	M	glycosyl transferase
25704_SMRU18_00530	lgt	04RU0,05C3B,0NEKR,COG0682	M	prolipoprotein diacylglyceryl transferase
25704_SMRU18_00666	ynaI	04T2Z,05D8X,0NF8J,COG0668	M	mechanosensitive ion channel
25704_SMRU18_00724	murE	04RF5,07EEN,0NDQ3,COG0769	M	UDP-N-acetylmuramyl tripeptide synthase MurE
25704_SMRU18_00967	group_8139	04US5,08WME,0NIWT,COG3307	M	O-Antigen Polymerase family
25704_SMRU18_01025	arnB	04STP,05CF4,0NDEZ,COG0399	M	capsular polysaccharide biosynthesis protein
25704_SMRU18_01326	srtA	04UXT,08Z6X,0NJ7G,COG3764	M	sortase SrtA
25704_SMRU18_01372	licC	054JD,08I61,0P64G,COG4750	M	CTP:phosphocholine cytidylyltransferase
25704_SMRU18_01377	tacF	04T8Y,08KV1,0NH0P,COG2244	M	teichoic acid subunit flippase
25704_SMRU18_01378	licD1	04VRB,05KPE,0NM23,COG3475	M	phosphorylcholine transferase LicD1
25704_SMRU18_01379	licD2	04TIY,08QVA,0NGX9,COG3475	M	licD2 protein
25704_SMRU18_01468	galE_2	04RG5,05CMR,0NDG6,COG1087	M	UDP-glucose 4-epimerase
25704_SMRU18_01508	murF	04SAZ,07EES,0NDEE,COG0770	M	UDP-N-acetylmuramoylalanyl-D-glutamyl-2, 6-diaminopimelate--D-alanyl-D-alanyl ligase
25704_SMRU18_01509	ddL	04RA9,05CPF,0ND93,COG1181	M	D-ala,D-ala ligase
25704_SMRU18_01604	galU	04RZT,05C3Y,0NDTB,COG1210	M	UTP-glucose-1-phosphate uridylyltransferase
25704_SMRU18_01713	mgtA	04RA7,05BZF,0NF1D,COG0438	M	glycosyltransferase, group 1 family protein
25704_SMRU18_01714	cpoA	04RPT,05W2C,0NECQ,COG0438	M	glycosyl transferase CpoA
25704_SMRU18_01741	dltB	04R60,05CK0,0ND5D,COG1696	M	transport protein DltB
25704_SMRU18_01945	glmU	04R9S,05CAJ,0ND90,COG1207	M	bifunctional N-acetylglucosamine-1-phosphate uridyltransferase/glucosamine-1-phosphate acetyltransferase
25704_SMRU18_01962	era	04SQH,05CWT,0ND65,COG1159	M	GTP-binding protein Era
25704_SMRU18_02009	group_5724	04S5N,05DMS,0ND73,COG0769	M	UDP-N-acetylmuramyl tripeptide synthetase, Mur ligase
25704_SMRU18_02113	murG	04RXN,05DVQ,0NEEJ,COG0707	M	UDP-N-acetylglucosamine:LPS N-acetylglucosamine transferase
25704_SMRU18_00012	group_6295	04RXW,07S19,0ND5C,COG0612	O	zinc-dependent protease
25704_SMRU18_00042	ftsH	04RMJ,05C3H,0NDGY,COG0465	O	cell-division protein
25704_SMRU18_00086	clpP	04RVT,05CCQ,0NECV,COG0740	O	ATP-dependent Clp protease proteolytic subunit
25704_SMRU18_00461	msrA	04UY5,05E0X,0NDW0,COG0225,COG0229	O	bifunctional methionine sulfoxide reductase
25704_SMRU18_00561	trxA_3	04SHT,05C3M,0NE5Z,COG0492	O	thioredoxin reductase
25704_SMRU18_00565	spxA_3	04VN7,080E8,0NKVH,COG1393	O	ArsC family protein
25704_SMRU18_00612	hslO	04RCS,05F4C,0NEBA,COG1281	O	heat shock protein 3HSP33 homolog
25704_SMRU18_00797	groEL	04R5U,05CJ9,0ND63,COG0459	O	chaperone GroEL
25704_SMRU18_00798	groES	04VJK,05K5Y,0NKN3,COG0234	O	CH10_SMI 10 kDa chaperonin (protein Cpn10)
25704_SMRU18_01103	dnaK	04RGE,05CFG,0NDF8,COG0443	O	molecular chaperone DnaK
25704_SMRU18_01104	grpE	04UV3,05K90,0NJEM,COG0576	O	heat shock protein GrpE
25704_SMRU18_01235	group_5269	04RUC,05DIW,0NE5T,COG0719	O	Iron-sulfur cluster assembly protein SufB
25704_SMRU18_01238	sufD	04SGD,05JRK,0NEY6,COG0719	O	FeS assembly protein SufD
25704_SMRU18_01239	sufC	04RSX,05C3K,0NE5J,COG0396	O	FeS assembly ATPase SufC
25704_SMRU18_01475	trxA_2	04VN6,05K63,0NKNR,COG0526	O	thioredoxin
25704_SMRU18_01488	tpx	04U14,08V1J,0NI32,COG2077	O	thiol peroxidase
25704_SMRU18_01619	radA	04RF9,05DNJ,0NDEH,COG1066	O	DNA repair protein
25704_SMRU18_01687	gor	04SUZ,05DC8,0NFME,COG1249	O	glutathione reductase
25704_SMRU18_01902	clpC_1	05C2Z,0ND4R,COG0542	O	ATP-dependent Clp protease, ATP-binding subunit
25704_SMRU18_01933	pcp_2	04TRW,08KN7,0NFD6,COG2039	O	pyroglutamyl-peptidase I
25704_SMRU18_01956	smpB	04U6M,08UH4,0NI29,COG0691	O	SsrA-binding protein
25704_SMRU18_01993	lspA	04VRV,05M02,0NKWF,COG0597	O	lipoprotein signal peptidase, signal peptidase type II
25704_SMRU18_00006	ecfT	04SMY,05EK6,0NDS1,COG0619	P	ABC transporter permease, cobalt transport
25704_SMRU18_00007	ecfA2	054UW,08JJB,0P6MN,COG1122	P	cobalt ABC transporter ATP-binding protein
25704_SMRU18_00008	ecfA1	054UN,08JJB,0P6MG,COG1122	P	ABCtransporter ATP-binding protein cobalt transport
25704_SMRU18_00178	group_7415	04U1Z,08TG4,0NHKE,COG4300	P	Cad superfamily protein
25704_SMRU18_00231	spxA_1	COG1393	P	transcriptional regulator Spx
25704_SMRU18_00490	potA	04RPS,05C53,0NDIN,COG3842	P	spermidine/putrescine transport ATP-binding protein
25704_SMRU18_00515	pstB2	04RTD,05BZY,0ND7K,COG1117	P	ABC transporter, ATP-binding protein-phosphate transport, (Phosphate-transporting ATPase 2)
25704_SMRU18_00516	pstA_1	04S33,05E2Z,0NDYC,COG0581	P	phosphate ABC transporter permeae PstA
25704_SMRU18_00517	pstC_1	04RC3,05C8U,0ND6J,COG0573	P	phosphate transport protein PstC
25704_SMRU18_00596	group_5974	04X3I,061R1,0NPE3,COG0526	P	thioredoxin, bacteriocin transport accessory protein
25704_SMRU18_00699	fieF	04RQX,076HS,0NF5N,COG0053	P	cation efflux family protein
25704_SMRU18_00951	shetA	04U55,07V8S,0NGAS,COG1275	P	exfoliative toxin
25704_SMRU18_01135	tlyC	04S3N,05C37,0NDM4,COG1253	P	CBS domain membrane protein
25704_SMRU18_01182	cbiQ	04SSS,06GWW,0NEKW,COG0619	P	ABC transporter permease
25704_SMRU18_01190	lmb	04V5V,05DSE,0NEII,COG0803	P	adhesion lipoprotein
25704_SMRU18_01463	group_7617	04UYH,08Z8G,0NJ9X,COG2824	P	phnA protein
25704_SMRU18_01485	fhuC_1	04TZQ,05DIK,0NDW9,COG1121	P	manganese ABC transporter ATP-binding protein
25704_SMRU18_01487	psaA	04SIT,05DSE,0NEP2,COG0803	P	manganese ABC transporter manganese-binding adhesion liprotein
25704_SMRU18_01519	ugpA_1	04UCB,08KAE,0NEDR,COG1175	P	ABC transporter membrane protein
25704_SMRU18_01607	phoU_2	04UCK,08UTW,0NIDS,COG0704	P	phosphate transport system regulatory protein PhoU
25704_SMRU18_01608	pstB3_2	04RTD,05BZY,0ND7K,COG1117	P	phosphate transporter ATP-binding protein
25704_SMRU18_01611	pstS_2	04TYD,07S17,0P2H8,COG0226	P	phosphate ABC transporter substrate-binding protein
25704_SMRU18_01620	group_7057	04W17,05I4G,0NJ14,COG0288	P	carbonic anhydrase
25704_SMRU18_01736	adcB	04SN6,05FAV,0NEGC,COG1108	P	zinc ABC transporter permease
25704_SMRU18_01737	adcC	04THQ,05FDK,0NF8M,COG1121	P	ATP-binding protein, Mn
25704_SMRU18_01890	sodA	04S88,05CK4,0NEK5,COG0605	P	superoxide dismutase
25704_SMRU18_01904	tauB	04UHJ,05D7T,0NF2V,COG1116	P	nitrate/sulfonate/bicarbonate ABC transporter ATP-binding protein
25704_SMRU18_01905	tauA	04TMU,05ET9,0NFFH,COG0715	P	ABC transportersubstrate-binding protein, nitrate/sulfonate/bicarbonate transport
25704_SMRU18_01906	tauC	04VC0,05EFP,0NE6C,COG0600	P	ABC transporter permease, nitrate/sulfonate/bicarbonate transport
25704_SMRU18_02080	ctpA	04RFT,05C59,0ND5J,COG2217	P	cation transporter E1-E2 family ATPase
25704_SMRU18_02089	group_6605	04VBS,08W7F,0NJ6Z,11MR9	P	cobalt ABC transporter domain-containing protein
25704_SMRU18_00510	aldC	04UV0,07FQX,0NJ80,COG3527	Q	alpha-acetolactate decarboxylase
25704_SMRU18_00675	group_4202	04TW8,05DXX,0NHMT,COG0500	Q	SAM-dependent methyltransferase
25704_SMRU18_00749	lrp	04UN3,05M9G,0NM16,COG2508	Q	leucine-rich protein
25704_SMRU18_00003	ssaA2	0549G,08FMM,0P5GF,COG3883,COG3942	S	CHAP domain-containing protein
25704_SMRU18_00010	group_6294	COG1426	S	transcriptional regulation protein
25704_SMRU18_00013	group_11597	COG2501	S	S4 domain-containing protein YaaA
25704_SMRU18_00017	yheS_1	04RF1,05C5H,0NDHZ,COG0488	S	ABC transporter ATPase
25704_SMRU18_00027	rlmH	04U7V,08UXA,0NI3G,COG1576	S	rRNA large subunit methyltransferase
25704_SMRU18_00032	group_7398	04WG9,05VDK,0NNHY,COG4481	S	FIG01114317: hypothetical protein
25704_SMRU18_00082	group_6832	04USN,08S8M,0NHJ7,COG1307	S	fatty-acid binding protein
25704_SMRU18_00122	yccU	04WA2,05K4P,0NJNG,COG1832	S	CoA-binding protein
25704_SMRU18_00232	group_7425		S	lipoprotein, putative
25704_SMRU18_00235	group_11314	04WM9,05VPH,0NNRH,COG3906	S	YrzB
25704_SMRU18_00237	group_4348		S	lipoprotein
25704_SMRU18_00333	group_6874	051TR,06XY9,0NXFV,0YTGD	S	Staphylococcal protein of unknown function (DUF960)
25704_SMRU18_00388	recU	04UAZ,08UI2,0NI47,COG3331	S	recombination protein U
25704_SMRU18_00406	group_8067	04UJ9,08VZS,0NISZ,COG4758	S	transporter
25704_SMRU18_00416	lemA	04U8F,08V0P,0NH8D,COG1704	S	Cytoplasmic membrane protein LemA
25704_SMRU18_00431	nrnA	04RHZ,05SFS,0NE4A,COG0618	S	DHH subfamily 1 protein
25704_SMRU18_00474	group_6360	COG3679	S	3-phosphoshikimate 1-carboxyvinyltransferase
25704_SMRU18_00524	group_8073	04UZI,05XTF,0NP9J,COG4478	S	integral membrane protein
25704_SMRU18_00528	group_7492		S	exported hydrophilic protein
25704_SMRU18_00535	lytA_2	COG5263	S	choline binding protein
25704_SMRU18_00540	group_5970		S	hypothetical protein
25704_SMRU18_00576	ynzC	04WIH,05VPS,0NNI0,COG4224	S	FIG01114118: hypothetical protein
25704_SMRU18_00585	mocA	04SPH,05EE0,0NFGS,COG0673	S	Gfo/Idh/MocA family oxidoreductase
25704_SMRU18_00600	group_4518	04UPA,08V37,0NIYF,COG0457	S	TPR domain protein
25704_SMRU18_00601	yhhT_2	04RKU,05C02,0NEF8,COG0628	S	transport protein
25704_SMRU18_00668	group_8089	04VKY,08WJV,0NIBD,COG2179	S	HAD superfamily hydrolase protein
25704_SMRU18_00669	yqeH	04RJP,05CQW,0NDFM,COG1161	S	GTP-binding protein
25704_SMRU18_00674	ybeB	04VMA,05KEM,0NKNX,COG0799	S	putative iojap protein
25704_SMRU18_00676	group_2599	04S7V,05CDE,0ND7A,COG1323	S	putative nucleotidyltransferase
25704_SMRU18_00687	yjjP	04RRI,05DWK,0NFHM,COG2966	S	membrane spanning protein
25704_SMRU18_00688	group_6898	04W3E,05WDI,0NNIT,COG3610	S	membrane protein
25704_SMRU18_00691	ybbP	04S7R,05C8B,0NE2I,COG1624	S	Hypothetical protein YbbP, contains nucleotide-binding domain of DisA bacterial checkpoint controller
25704_SMRU18_00720	murE2	0511W,06V2Y,0NWPU,0YP8N	S	UDP-N-acetylmuramoylalanyl-D-glutamate--2, 6-diaminopimelate ligase
25704_SMRU18_00723	group_5391	052J7,06DH0,0NT08,0XW6H	S	CsbD-like protein
25704_SMRU18_00733	group_7509		S	ATP-binding protein
25704_SMRU18_00736	group_8095	04VH6,08ZEE,0NJQX,11Q3E	S	GNAT family acetyltransferase
25704_SMRU18_00737	yceG	04R9E,05HHA,0ND8D,COG1559	S	aminodeoxychorismate lyase
25704_SMRU18_00750	mrnC	04UXZ,05KEB,0NKS5,COG1939	S	RIBOc superfamily protein
25704_SMRU18_00863	group_8111	04XUS,06CCZ,0NR58,COG4699	S	DNA binding protein
25704_SMRU18_00870	group_3558		S	late competence protein ComGG
25704_SMRU18_00877	group_5229	04UVP,08Z7S,0NJ82,COG1847	S	jag protein
25704_SMRU18_00942	group_7549	04S6Q,05EA8,0NE0P,COG2070	S	putative enoyl-(acyl-carrier-protein) reductase II
25704_SMRU18_00948	group_7550	04WIP,0615K,0NQSW,COG4687	S	ManO
25704_SMRU18_00952	group_5578	08T6S,COG2128	S	macrophage infectivity potentiator protein
25704_SMRU18_00956	cvpA	06ZT0,0NXP2,COG1286	S	CvpA family protein
25704_SMRU18_00957	group_8137	04XNS,067Y4,0NR3J,0XUW5	S	seryl-tRNA synthetase
25704_SMRU18_01056	group_6479	061M1,0NNWV,COG3237	S	CsbD-like protein
25704_SMRU18_01057	group_11448	04UAF,05VBF,0NIXZ,COG1302	S	general stress protein 24
25704_SMRU18_01072	group_6983	04VFV,05GS4,0NJXX,COG1598	S	phage-like protein
25704_SMRU18_01073	group_5260	04X5Z,065N6,0NP32,1289G	S	FIG01116978: hypothetical protein
25704_SMRU18_01100	group_5262		S	Hypothetical protein in cluster with Ecs transporter (in Streptococci)
25704_SMRU18_01123	ydiB	04UU2,05K8N,0NKMQ,COG0802	S	putative ATPase
25704_SMRU18_01124	group_5265		S	lipoprotein, putative
25704_SMRU18_01144	ybhL	04UVX,05HFZ,0NJ86,COG0670	S	membrane protein
25704_SMRU18_01152	group_6988	07QSV,0NDMD,COG1322	S	competence-induced protein Ccs50
25704_SMRU18_01169	group_4287	04VQ4,05T4N,0NMMB,COG4129	S	signal peptide
25704_SMRU18_01178	ribU	0551H,089BQ,0P6ZD,COG3601	S	riboflavin transporter
25704_SMRU18_01196	group_8158	067S9,0NQY6,COG1983	S	PspC domain-containing protein
25704_SMRU18_01226	group_3659		S	membrane protein
25704_SMRU18_01291	rnjB	04RGQ,05CN5,0NDNW,COG0595	S	metallo-beta-lactamase superfamily protein
25704_SMRU18_01306	recX	04UBG,0902V,0NJ7N,COG2137	S	regulatory protein RecX
25704_SMRU18_01339	panT	04VU9,05FH5,0NJJ3,COG4684	S	membrane protein
25704_SMRU18_01368	ybaN	0800A,0NNN3,COG2832	S	3-isopropylmalate dehydrogenase
25704_SMRU18_01386	group_5281	04UU5,05KNH,0NM1D,COG1399	S	putative metal-binding, possibly nucleic acid-binding protein
25704_SMRU18_01391	tmpC	04RRV,05DIH,0NDJ2,COG1744	S	lipoprotein
25704_SMRU18_01412	ykuJ	04XQV,06ATM,0NPVK,COG4703	S	FIG01114188: hypothetical protein
25704_SMRU18_01427	group_5105	067Z4,0NR69,0XV6C	S	hypothetical protein
25704_SMRU18_01428	rr06-1		S	hypothetical protein
25704_SMRU18_01462	group_7017	05R77,121TR	S	membrane protein
25704_SMRU18_01465	rpsO_2		S	30S ribosomal protein S15
25704_SMRU18_01470	group_3830	04RY5,05EGD,0NE02,COG0327	S	NIF3 (NGG1p interacting factor 3) family protein
25704_SMRU18_01471	trmK	04U6S,08V39,0NI7R,COG2384	S	Bcl-2 family protein
25704_SMRU18_01476	rpsP_1		S	30S ribosomal protein S16
25704_SMRU18_01483	group_7021	04URG,08WA6,0NJ3P,COG0491	S	metallo-beta-lactamase superfamily protein
25704_SMRU18_01501	group_7622	COG0762	S	integral membrane protein
25704_SMRU18_01502	sepF	04Y6N,05VR5,0NNQX,COG1799	S	YlmF protein
25704_SMRU18_01515	group_3629	04WD0,05MU9,0NMN1,COG5578	S	membrane protein
25704_SMRU18_01547	engA	04R5E,05DKZ,0ND50,COG1160	S	GTP-binding protein EngA
25704_SMRU18_01558	ydjZ	04V0G,05FVH,0NJBR,COG0398	S	SNARE associated Golgi protein
25704_SMRU18_01626	metG_1	04WPJ,05VNP,0NNQT,12223	S	methionine--tRNA ligase
25704_SMRU18_01634	group_8955		S	membrane protein
25704_SMRU18_01654	yjbM	04S7T,07XUU,0NFRE,COG2357	S	GTP pyrophosphokinase
25704_SMRU18_01658	group_8194	COG0718	S	hypothetical cytosolic protein
25704_SMRU18_01688	bioY2	04WZ4,05VKD,0NNU5,COG1268	S	biotin synthase
25704_SMRU18_01695	group_11872	04WNK,05VB6,0NNG4,COG1837	S	KH domain-containing protein
25704_SMRU18_01709	group_12183		S	putative extracellular protein
25704_SMRU18_01710	obg	04RPW,05C9R,0NDTZ,COG0536	S	GTP-binding protein
25704_SMRU18_01711	group_7640		S	FIG01114947: hypothetical protein
25704_SMRU18_01712	group_6572	COG1983	S	putative stress-responsive transcriptional regulator
25704_SMRU18_01751	guaA_2	04UVV,08Z86,0NJMP,COG2071	S	glutamine amidotransferase, class-I
25704_SMRU18_01788	asp	04UTG,08ZAA,0NJ8Q,COG1302	S	alkaline shock protein
25704_SMRU18_01789	group_12091	04RVC,05DP4,0ND7M,COG1461	S	kinase
25704_SMRU18_01810	group_6585	04UMB,08V7D,0NIC1,COG4720	S	protein YdcD
25704_SMRU18_01820	group_6586		S	Helicase
25704_SMRU18_01821	group_5347		S	aldose 1-epimerase
25704_SMRU18_01823	group_5714	04WIU,05WX8,0NPI7,1243S	S	Domain of unknown function (DUF1858)
25704_SMRU18_01907	group_5013	04XBB,05PI3,0NJSH,COG0011	S	Uncharacterized conserved protein
25704_SMRU18_01910	group_6596	04VKT,05W42,0NNIW,COG4466	S	FIG01114855: hypothetical protein
25704_SMRU18_01917	yigZ	04TS3,08ZK7,0NJBM,COG1739	S	Xaa-Pro dipeptidase
25704_SMRU18_01925	plsY	04UD5,05K7Z,0NIEW,COG0344	S	putative glycerol-3-phosphate acyltransferase PlsY
25704_SMRU18_01947	group_7095	04SW6,05D4H,0NGTU,COG2035	S	integral membrane protein
25704_SMRU18_01952	group_5888	04UND,08VQJ,0NEP3,COG4122	S	O-methyltransferase
25704_SMRU18_01964	group_8228	04UUX,05KGE,0NKQ4,COG0319	S	putative metalloprotease
25704_SMRU18_01980	cvfB	04RAV,05QNR,0NESM,COG2996	S	s1 RNA binding domain protein
25704_SMRU18_01984	rsmI	04RFY,05CU0,0NDNI,COG0313	S	tetrapyrrole methylase
25704_SMRU18_01985	group_8231	04WGD,063V3,0NNHK,COG4467	S	DNA replication intiation control protein YabA
25704_SMRU18_01996	group_3868		S	hypothetical protein
25704_SMRU18_01997	yidA_3	04U7Y,0667J,0NNEF,COG0561	S	Cof family protein
25704_SMRU18_02027	engB	04SAA,05WHM,0NE4Q,COG0218	S	ribosome biogenesis GTP-binding protein YsxC
25704_SMRU18_02029	yvcJ	04S0T,05C21,0ND8A,COG1660	S	P-loop-containing kinase
25704_SMRU18_02030	group_6126	04SVX,05CHW,0NDQB,COG0391	S	transporter
25704_SMRU18_02087	thiW	04URJ,05NJS,0NJ1D,COG4732	S	ThiW superfamily protein
25704_SMRU18_02118	group_7667		S	membrane protein
25704_SMRU18_02123	yqgQ	04WW4,05XQ7,0NPAD,COG4483	S	hypothetical cytosolic protein
25704_SMRU18_02126	rnz	04R7G,05IES,0NDS9,COG1234	S	hydrolase
25704_SMRU18_02127	group_5020		S	cystathionine beta-lyase
25704_SMRU18_02145	group_5739		S	hypothetical protein
25704_SMRU18_00275	group_7433	04WP6,05VUC,0NNJA,COG3830	T	ACT domain-containing protein
25704_SMRU18_00365	luxS	04TQD,06762,0NH6Q,COG1854	T	S-ribosylhomocysteinase
25704_SMRU18_00685	group_7503	04UK4,08ZF3,0NJF9,COG0631	T	serine/threonine phosphatase
25704_SMRU18_00686	prkC	04R61,05D9P,0ND8P,COG0515,COG2815	T	Stk1
25704_SMRU18_01242	msrC	04U8E,08ZGC,0NI41,COG1956	T	GAF domain-containing protein
25704_SMRU18_01299	vncS	04WE1,05EP4,0NF6J,COG0642	T	VncS histidine kinase TCS10
25704_SMRU18_01300	regX3	04S90,08S90,0NET2,COG0745	T	VncR, response regulator
25704_SMRU18_01333	micB	04RCK,05BZU,0NDAC,0XNMH	T	histidine kinase
25704_SMRU18_01334	yycF	04S3T,05CK6,0NEJH,COG0745	T	DNA-binding response regulator
25704_SMRU18_01612	phoR	04RBW,05BZU,0NDAC,0XNMH	T	histidine kinase PnpS
25704_SMRU18_01613	phoP	04RRZ,05DPZ,0NDMU,COG0745	T	response regulator
25704_SMRU18_01887	saeR	04TZX,08TR3,0NHU4,COG0745	T	response regulator
25704_SMRU18_01888	saeS	04UVF,08YBA,0NIBX,COG0642	T	histidine kinase
25704_SMRU18_02119	typA	04S9C,05CI3,0NDNS,COG1217	T	GTP-binding protein TypA
25704_SMRU18_02138	yehU	04RT0,05C2F,0ND8T,COG2972	T	histidine kinase
25704_SMRU18_02139	araC	04U6N,08U36,0NI6V,COG4753	T	DNA-binding response regulator
25704_SMRU18_00266	secY	04SAP,05CGG,0NDBW,COG0201	U	preprotein translocase, SecY subunit
25704_SMRU18_00419	ffh	04SII,05CB9,0NE07,COG0541	U	signal recognition particle protein
25704_SMRU18_00867	cglD	COG2165	U	competence protein CglD
25704_SMRU18_00868	group_12075	COG2165	U	type II secretory pathway, pseudopilin PulG
25704_SMRU18_00959	spsB	04TUH,05C3F,0NMG4,COG0681	U	signal peptidase I
25704_SMRU18_01097	group_4930	COG4473	U	ABC transporter permease
25704_SMRU18_01147	misCB	04RN7,07XQC,0NF0T,COG0706	U	oxaA2
25704_SMRU18_01350	ftsY	04R5G,05CCP,0NDM1,COG0552	U	cell division protein FtsY
25704_SMRU18_01840	secE	COG0690	U	preprotein translocase secE component, COG0690
25704_SMRU18_01958	secG	04YAG,06E3D,0NRIT,COG1314	U	membrane protein involved in protein export SecG
25704_SMRU18_00459	ABC-N/P	04R5W,05BZ1,0NDFU,COG1132	V	ABC transporter ATP-binding protein/permease
25704_SMRU18_00850	mepA	04SS6,05UQX,0NDNV,COG0534	V	multi antimicrobial extrusion (MATE) family transporter
25704_SMRU18_01098	ecsA_4	04RIK,05E5I,0NDES,COG1131	V	ABC transporter ATP-binding protein
25704_SMRU18_01288	fibB	04TT0,08RMH,0NHFT,COG2348	V	peptidoglycan branched peptide synthesis protein, femAB family
25704_SMRU18_01289	femX	08TV1,0NISK,COG2348	V	serine/alanine-adding enzyme MurM
25704_SMRU18_01302	lolD_2	04SNI,06C35,0NEHH,COG1136	V	ABC transporter, ATP-binding protein Vexp2
25704_SMRU18_01684	macB_3	04SKV,07RBB,0NDJN,COG0577	V	ABC transporter permeae
25704_SMRU18_01685	salX	04RS8,05C19,0ND7E,COG1136	V	ABC transporter ATP-binding protein
25704_SMRU18_01800	bacA	04S0I,05DWR,0NDN1,COG1968	V	undecaprenol kinase
25704_SMRU18_00708	ypmB	COG5353	S	peptidase propeptide and ypeb domain-containing protein
25704_SMRU18_00814	group_3704	050RJ,06UVI,0NWPD,0YNYF	S	hypothetical protein
25704_SMRU18_00878	sapR	067P4,0NWB8,12D34	S	sakacin A production response regulator
25704_SMRU18_01176	group_4037	063XG,0NQDA,127T7	S	putative histone acetyltransferase

## Sheet: Additional core genes (n=354)
Representative gene ID	Gene	eggnog hit	COG functional category	Product
26112_135631_00256	lpd	04STE,07QN2,0NDG4,COG1249	C	triosephosphate isomerase
26112_135631_00510	acyP	04XHW,0855V,0NR8R,COG1254	C	ribulose-phosphate 3-epimerase
26112_135631_00624	lpdA	04RK6,07QN2,0NDG4,COG1249	C	Protein of unknown function (DUF2812)
26112_135631_00814	ugpQ	04TH5,05YNR,0NFG6,COG0584,COG4781	C	phosphate ABC transporter
26112_135631_00941	yvgN	04R8P,05CV8,0NDP9,COG0656	C	membrane protein
26112_135631_00981	pfl	04SGJ,05C6N,0NDSG,COG1882	C	cppA protein
26112_135631_01554	atpF	04UKX,07ZFM,0NIBP,COG0711	C	CrcB protein
26112_135631_01601	ppc	04S5R,05CCA,0NFEH,COG2352	C	DNA polymerase III subunits gamma and tau
26112_135631_01724	group_3935	054DM,08RDS,0NKJR,COG0778	C	alanine racemase
26112_135631_01981	adhE	04S4K,05C0A,0ND6Y,COG1012,COG1454	C	farnesyl diphosphate synthase
26112_135631_01998	ackA	04RNS,05C6H,0NDCF,COG0282	C	ribonucleotide-diphosphate reductase, subunit beta
26112_135631_02009	adh	04R9R,05E2A,0NEI8,COG1063	C	Phosphoenolpyruvate-protein phosphotransferase of PTS system
26112_135631_00868	smc	04SGC,05CDB,0NDNP,COG1196	D	cytochrome c-type biogenesis protein CcdA
26112_135631_01477	crcB1	04XGY,06A8V,0NR8G,COG0239	D	transcription regulator, MarR family
26112_135631_01478	crcB2	04XGY,06A8V,0NR8G,COG0239	D	3-oxoacyl-ACP synthase III
26112_135631_01670	divIVA	04W38,05MMF,0NKY7,COG3599	D	UDP-N-acetylglucosamine 1-carboxyvinyltransferase 2
26112_135631_00283	opuCC	04RAM,05E90,0NEEX,COG1174,COG1732	E	LacI family transcriptional regulator
26112_135631_00288	pepA_1	04RU6,05CN9,0NDPU,COG1363	E	choline transporter
26112_135631_00390	proB	04RG8,05CGT,0NDT8,COG0263	E	dehydrogenase
26112_135631_00400	aguA	04R65,05DWY,0NG0H,COG2957	E	transcriptional regulator
26112_135631_00405	speA	04S2S,05CXN,0NDYG,COG1982	E	gamma-glutamyl kinase
26112_135631_00422	thrB	05D5I,0NF28,COG0083	E	ornithine decarboxylase family protein
26112_135631_00431	pheA	04SRZ,05CQC,0NEDY,COG0077	E	glycosyl transferase
26112_135631_00437	aroB	04RII,05D49,0NE7I,COG0337	E	phosphorylcholine transferase LicD3
26112_135631_00449	potB	04RX5,05F38,0NDV3,COG1176	E	alpha-amylase
26112_135631_00513	asnA	04SD7,05CU9,0NDAD,COG2502	E	acylphosphate phosphohydrolase
26112_135631_00532	sarA_2	COG4166	E	UDP-N-acetylglucosamine 1-carboxyvinyltransferase
26112_135631_00651	trpE	04S10,05CRQ,0NDYI,COG0147	E	ribonuclease HII
26112_135631_00652	pabA	04UZF,05DDQ,0NHCX,COG0512	E	tyrosine recombinase
26112_135631_00653	trpD2	054IH,08I0Q,0P62P,COG0547	E	dihydrolipoyl dehydrogenase
26112_135631_00734	dapD	04RKT,05DMJ,0NFJ2,COG2171	E	4-alpha-glucanotransferase (amylomaltase)
26112_135631_00735	ykuR	04RK4,05CH2,0NDQE,COG1473	E	maltodextrin phosphorylase
26112_135631_00994	ilvB	04REF,05C7K,0NE0A,COG0028	E	membrane associated protein
26112_135631_01056	dapA	04RE1,05CDP,0NDUN,COG0329	E	DegV family protein
26112_135631_01089	sdaB	04U1Q,08UZK,0NIJ0,COG1760	E	HAD superfamily hydrolase
26112_135631_01134	thiO	04S2Z,07VFR,0NESD,COG0665	E	phosphatase
26112_135631_01287	pepC	04SNY,05CTZ,0NECX,COG3579	E	organic radical activating chaperone
26112_135631_01511	pepXP	04RJU,05GYP,0NDFQ,0XPUZ	E	dCMP deaminase
26112_135631_01563	yecS_1	04RWM,05CJ8,0NDDH,COG0765	E	S1 RNA-binding domain-containing protein
26112_135631_01633	aroG	04T5D,05E99,0NEI3,COG0722	E	amino acid ABC transporter permease
26112_135631_01723	tcyJ	04UIJ,08PRV,0NGY0,COG0834	E	4'-phosphopantetheinyl transferase
26112_135631_01816	group_3183	COG0346	E	penicillin-binding protein 2B
26112_135631_01817	spxB	04REF,05C7K,0NE0A,COG0028	E	cell division protein DivIVA
26112_135631_01845	aspC	04Z82,05CHM,0ND77,COG0436	E	lipase
26112_135631_00733	yicL_1	04TS2,08UZ3,0NHFI,COG0697	E	maltose/maltodextrin ABC transporter maltose/maltodextrin-binding protein
26112_135631_00887	group_4417	04YWS,06VZK,0NTE8,COG0697	E	phosphopantothenate--cysteine ligase
26112_135631_00174	purB	04RBQ,05C83,0NDAB,COG0015	F	GntR family transcriptional regulator
26112_135631_00176	purK	04RXG,05CY8,0NDW3,COG0026	F	adenylosuccinate lyase
26112_135631_00179	purH	04R8C,05DC1,0NDM0,COG0138	F	phosphoribosylaminoimidazole carboxylase ATPase subunit
26112_135631_00181	purN	04UWV,08V3E,0NIEN,COG0299	F	teicoplanin resistance protein
26112_135631_00183	purF	04RYT,05CBA,0NDMY,COG0034	F	phosphoribosylglycinamide formyltransferase
26112_135631_00185	purC	04SMQ,05C8V,0NDWH,COG0152	F	amidophosphoribosyltransferase
26112_135631_00301	rdgB	053DC,08V82,0NI88,COG0127	F	segregation and condensation protein A
26112_135631_00809	nudF	04V5G,08YZ4,0NJ9U,COG0494	F	peptidase, S54
26112_135631_00894	carB	04SB4,05CU6,0NDUK,COG0458	F	transcriptional regulator
26112_135631_01238	adk	05CC8,0NE29,COG0563	F	magnesium transporter CorA family protein
26112_135631_01456	comEB	04T1T,08UK2,0NI50,COG2131	F	Holliday junction-specific endonuclease
26112_135631_01573	prs	04ZHR,05C5T,0NDMJ,COG0462	F	ABC transporter substrate-binding protein
26112_135631_01750	punA	04SFU,05CB1,0NDJJ,COG0005	F	branch migration of Holliday junctions, junction-specific DNA helicase,ATP-dependent DNA helicase, recG homolog
26112_135631_01890	nrdD_2	07VC8,0NGBD,COG1372	F	glyoxalase family protein
26112_135631_01949	nrdF	04S2B,05E05,0NEPZ,COG0208	F	DNA-binding response regulator CiaR
26112_135631_00167	PTS-EII_1	04VS3,05QEG,0NKIA,COG2893	G	tagatose-6-phosphate ketose/aldose isomerase
26112_135631_00168	manZ_3	04RSZ,07E9Z,0NDP2,COG3716	G	phosphotransferase system sugar-specific EII component
26112_135631_00169	PTS-EIIC	04S7Q,08KDH,0NG79,COG3715	G	PTS system transporter subunit IID
26112_135631_00170	PTS-EIIB	04U0V,08SUX,0NHV1,COG3444	G	PTS system, IIC component
26112_135631_00171	bgaC	04T1K,05D57,0NEFQ,COG1874	G	phosphotransferase system sugar-specific EIIB component
26112_135631_00245	tpiA	04RFM,05CP7,0ND5H,COG0149	G	DPS family peroxide resistance protein
26112_135631_00276	galK	04RNH,05CRD,0NDJ6,COG0153	G	hypothetical protein
26112_135631_00304	treC	04RBT,05CG3,0NE22,COG0366	G	deoxyribonucleotide triphosphate pyrophosphatase/unknown domain fusion protein
26112_135631_00443	amyS	04RQK,05E5K,0NDK2,COG0366	G	prephenate dehydratase
26112_135631_00468	yutF	04SAI,05D4U,0NESR,COG0647	G	phosphate transport system regulatory protein PhoU
26112_135631_00477	nagB	04RFV,05CKA,0NDTE,COG0363	G	methyl-accepting chemotaxis family domain-containing protein
26112_135631_00502	rpe	04TQ9,05DJV,0NH6F,COG0036	G	50S ribosomal protein L34
26112_135631_00698	group_3810	04W14,05SSR,0NP6W,COG3414	G	LSU ribosomal protein L33p @ LSU ribosomal protein L33p, zinc-independent
26112_135631_00700	tktN	054G0,08HHA,0P5WX,COG3959	G	50S ribosomal protein L32
26112_135631_00723	malX	04T2Y,07FKK,0NG46,COG2182	G	aspartyl-tRNA synthetase (aspartate-tRNA ligase)
26112_135631_00724	malM	054QJ,08IUJ,0P6D5,COG1640	G	YitT family protein
26112_135631_00725	glgP-2	054QT,08IUN,0P6DB,COG0058	G	maltose operon transcriptional repressor
26112_135631_00839	eno	04RSN,05C70,0NDKN,COG0148	G	DNA-binding protein
26112_135631_00942	pgdA	04UWZ,08ZJ4,0NJG4,COG0726	G	drug/metabolite transporter (DMT) superfamily permease
26112_135631_01125	group_3867	04YXU,08N8A,0NJVW,COG0477	G	putative L-serine dehydratase beta subunit
26112_135631_01464	bglA	COG2723	G	choline binding protein J
26112_135631_01560	ybhE	04RRD,05HHQ,0NETN,COG2706	G	50S ribosomal protein L31
26112_135631_01570	ppnK1	04R5P,05F91,0NE5P,COG0061	G	membrnae protein
26112_135631_01939	lacA	04ZX4,05RSI,0NMAM,COG0698	G	catabolite control protein A
26112_135631_01940	lacB-2	04SHN,08YZG,0NJ8W,COG0698	G	multidrug ABC transporter permease
26112_135631_01942	lacD	04SP4,05D2M,0NDXI,COG3684	G	FIG01114027: hypothetical protein
26112_135631_01944	lacF_2	04VXD,05VCP,0NNKC,COG1447	G	phosphatase
26112_135631_01953	ptsI	04S2N,05BZ3,0ND4N,COG1080	G	ATP cone domain-containing protein
26112_135631_01979	licB_2	04X65,05VZJ,0NNIH,COG1440	G	transcriptional regulator
26112_135631_01980	gmuA	04X96,05VCP,0NNKC,COG1447	G	bacteriocin immunity protein
26112_135631_01988	araD	04RSJ,05CR5,0NEMJ,COG0235	G	tagatose 1,6-diphosphate aldolase
26112_135631_01992	ulaB	04XXV,05WUU,0NNQ6,COG3414	G	lactose phosphotransferase system repressor
26112_135631_00822	ribF	04SB3,05DTN,0NEKH,COG0196	H	phosphate ABC transporter permeae PstC
26112_135631_00851	coaBC_1	050E2,05CJS,0NDKC,COG0452	H	DNA-binding protein HU 1
26112_135631_00852	coaBC_2	04REZ,05CJS,0NDKC,COG0452	H	DNA ligase
26112_135631_01189	ribH	04U6U,08UTT,0NH9S,COG0054	H	tRNA-specific 2-thiouridylase MnmA
26112_135631_01190	ribA	04R78,05C66,0NDC8,COG0108,COG0807	H	mutT/nudix family protein
26112_135631_01192	ribD	04RIV,05D1W,0NDPZ,COG0117,COG1985	H	metallo-beta-lactamase superfamily protein 1
26112_135631_01295	folP	050EI,05EEI,0NDHW,COG0294	H	50S ribosomal protein L23
26112_135631_01756	coaA	04RI0,05CS9,0NEFT,COG1072	H	phosphosugar-binding transcriptional regulator
26112_135631_01824	thiM_1	04UGI,05C4U,0NDB9,COG2145	H	manganese ABC transporter permease
26112_135631_01831	thiE_2	04UCQ,08UV6,0NI9D,COG0352	H	D-tyrosyl-tRNA(Tyr) deacylase
26112_135631_01926	ispA	04S6E,05CTB,0NE00,COG0142	H	putative aminotransferase AlaT
26112_135631_01973	nadC	04RMW,05D18,0NDU0,COG0157	H	16S_rRNA processing protein RimM
26112_135631_02022	group_3199	08X62,0NJ1I,COG3572	H	membrane protein
26112_135631_00469	group_2852	04UGB,08VEM,0NIYW,COG3884	I	hypothetical cytosolic protein
26112_135631_00890	tarI	04TMS,08QHG,0NFZV,COG1211	I	membrane protein
26112_135631_00959	bcrC_2	04WGM,07YJ2,0P3JR,COG0671	I	cytidylyltransferase
26112_135631_01209	cls	04S3G,05CQX,0ND7P,COG1502	I	response regulator
26112_135631_01421	fabH	04RD5,05CCZ,0ND61,COG0332	I	addiction module antitoxin, RelB/DinJ family
26112_135631_01428	fabZ	04U8Z,08YXN,0NJ74,COG0764	I	aminopeptidase
26112_135631_01635	acpS	04VKA,082V8,0NKPK,COG0736	I	putative sugar kinase
26112_135631_00007	group_6748	04WIY,082I2,0NNIK,COG1188	J	S4 RNA-binding domain-containing protein
26112_135631_00009	pth	04U6J,08ZPD,0NI3X,COG0193	J	peptidyl-tRNA hydrolase
26112_135631_00231	cysS	04RHU,05C8N,0NDM8,COG0215	J	membrane protein
26112_135631_00295	rluB	04RDB,05FE9,0NDTN,COG1187	J	iron-compound ABC transporter iron-compound-binding protein
26112_135631_00416	rplJ	04U79,08VZM,0NI4T,COG0244	J	agmatine deiminase
26112_135631_00444	alaS	04S1G,05CIM,0NDSJ,COG0013	J	3-dehydroquinate synthase
26112_135631_00491	rpmH	04XJP,05VG0,0NQZB,COG0230	J	HPr kinase/phosphorylase
26112_135631_00511	group_3791	04TAW,08RWN,0NHTR,COG0566	J	pyruvate formate-lyase-activating enzyme
26112_135631_00565	group_885	054ET,08V6X,0NJUT,COG1670	J	DNA-entry nuclease (competence-specific nuclease)
26112_135631_00574	rbfA	04VBW,05KG7,0NKNZ,COG0858	J	extracellular oligopeptide-binding protein
26112_135631_00575	infB	04RRY,07EEM,0NDMT,COG0532	J	branched-chain amino acid aminotransferase
26112_135631_00693	rpmGA	COG0267	J	anthranilate phosphoribosyltransferase
26112_135631_00694	rpmF	04XPF,086FC,0P3XV,COG0333	J	lipoprotein, putative
26112_135631_00717	aspS	04RM7,05C9M,0NDPW,COG0173	J	PTS system, IIB component
26112_135631_00731	tyrS	04R9X,05DA0,0ND99,COG0162	J	maltodextrin ABC transporter permease
26112_135631_00763	gidA_2	04R5C,07QXI,0NDXW,COG1206	J	2,3,4,5-tetrahydropyridine-2-carboxylate N-succinyltransferase
26112_135631_01019	rpsF	04VNJ,08ZDX,0NM7Q,COG0360	J	phosphatase
26112_135631_01061	hemK	04TXF,05EQY,0NHI1,COG2890	J	putative S-transferase
26112_135631_01062	rimN	04RRE,05EK0,0NDKZ,COG0009	J	protein YaaA
26112_135631_01124	truA	04S1I,05DI7,0NEAB,COG0101	J	acetyltransferase
26112_135631_01146	mnmA	04RPA,05CCJ,0ND5M,COG0482	J	nucleoside-diphosphate sugar isomerase
26112_135631_01218	rplD	04SIG,06U5A,0NEBN,COG0088	J	6,7-dimethyl-8-ribityllumazine synthase
26112_135631_01219	rplW	04VNS,080UE,0NKQJ,COG0089	J	3,4-dihydroxy-2-butanone 4-phosphate synthase
26112_135631_01221	rpsS	04UVA,05K7S,0NJ8B,COG0185	J	riboflavin biosynthesis protein RibD
26112_135631_01226	rpsQ	04VK3,05K87,0NKNM,COG0186	J	holiday junction DNA helicase RuvA
26112_135631_01230	rpsN2	04VKQ,082QR,0NNYP,COG0199	J	DNA-3-methyladenine glycosylase I
26112_135631_01233	rplR	04UV7,05K4C,0NJ8V,COG0256	J	membrane protein
26112_135631_01239	infA	04VM5,05K9U,0NKMP,COG0361	J	regulatory protein Spx
26112_135631_01437	gatA	04S9A,05C3P,0NE30,COG0154	J	dihydropteroate synthase
26112_135631_01446	prfB	04R6K,05CG1,0ND5I,COG1186	J	gluthatione peroxidase
26112_135631_01476	rplS	04UUZ,08YY1,0NJ7M,COG0335	J	ribonuclease HIII
26112_135631_01482	rpmE	04VJ4,082DI,0NNUC,COG0254	J	(3R)-hydroxymyristoyl-ACP dehydratase
26112_135631_01551	tuf	04RQE,05CGV,0NDR6,COG0050	J	CrcB protein
26112_135631_01687	dtd	04UW1,08YYA,0NJ7D,COG1490	J	ABC transporter ATP-binding protein
26112_135631_01891	trmD	04RGM,05D6X,0NE14,COG0336	J	putative oxidase
26112_135631_01892	rimM	04UTR,07Z8R,0NJCI,COG0806	J	hydroxyethylthiazole kinase
26112_135631_02012	tgt	04RCB,05C6U,0NDBB,COG0343	J	restriction endonuclease R.XbaI
26112_135631_00172	frlR	04V16,08Y3R,0NJPQ,COG2188	K	beta-galactosidase 3
26112_135631_00277	degA_2	04S3V,05CQ4,0NDWS,COG1609	K	galactokinase, (galactose kinase)
26112_135631_00296	scpB	04UXK,05K8I,0NJ8X,COG1386	K	alpha-hemolysin family protein
26112_135631_00306	treR	04UCN,07414,0NIG9,COG2188	K	family protein
26112_135631_00372	cpsY	04RYU,05GZI,0NDV2,COG0583	K	GTP-binding protein HflX
26112_135631_00710	group_3813	04X89,05VZ8,0NP77,COG1476	K	integral membrane protein
26112_135631_00719	malR	04RMY,05FKQ,0NEN2,COG1609	K	FIG01115288: hypothetical protein
26112_135631_00855	niaR	04UU1,08Z3G,0NJBS,COG1827	K	Enolase
26112_135631_00950	glnR	04VMZ,05KV4,0NM5R,COG0789	K	choline kinase
26112_135631_01063	group_1976	04W8Y,081CX,0NJ8R,COG0454	K	30S ribosomal protein S6
26112_135631_01096	group_6794	04W2E,05K7K,0NM7R,COG1695	K	polysaccharide biosynthesis protein
26112_135631_01187	group_2887	04X53,05X3U,0NP3Z,COG3279	K	major facilitator superfamily transporter-efflux
26112_135631_01420	marR	04WAU,05KGH,0NMEM,11N9R	K	pyruvate formate-lyase 3
26112_135631_01499	yhgF	04RDU,05BZM,0ND4U,COG2183	K	general stress protein, Gls24 family
26112_135631_01577	rex	04SNQ,05FF6,0NFHZ,COG2344	K	x-prolyl-dipeptidyl aminopeptidase
26112_135631_01618	yvoA_1	04WFP,0811P,0NKSR,COG1725	K	proton-translocating ATPase, F0 sector, subunit b
26112_135631_01658	ybbH	04UJX,06GGA,0NFVG,COG1737	K	DNA-binding protein
26112_135631_01851	ccpA_1	04RNA,05ETE,0NDG2,COG1609	K	esterase
26112_135631_01948	lacR	04VEN,05E98,0NIU0,COG1349	K	histidine kinase
26112_135631_02075	yebC	04RBC,05CDY,0ND9Z,COG0217	K	NAD-dependent aldehyde dehydrogenase
26112_135631_02081	group_2727	04VPY,05KN8,0NM17,COG3279	K	phosphotyrosine protein phosphatase
26112_135631_00619	rnhB	04T29,08UH2,0NFVD,COG0164	L	aminoglycoside phosphotransferase
26112_135631_00621	xerS	04UGU,08XZ3,0NI6A,COG0582	L	BlpT protein, fusion
26112_135631_00825	hupB	05K70,0NKPS,COG0776	L	serine-type D-Ala-D-Ala carboxypeptidase
26112_135631_00829	ligA	04S39,05C77,0NDDG,COG0272	L	MutT/NUDIX hydrolase family protein
26112_135631_01024	rlmG	04RZF,060K3,0NFN3,COG4123	L	pyruvate formate-lyase
26112_135631_01025	group_3118	04WFQ,05VC4,0NNH0,COG2827	L	hypothetical protein
26112_135631_01147	group_1334	04Y2H,05KZ5,0NPK6,COG0494	L	transcriptional regulator
26112_135631_01188	hexB	04RPN,05DC6,0ND9V,COG0323	L	oxidoreductase, DadA family protein
26112_135631_01194	ruvA	04UXF,05KA4,0NJGM,COG0632	L	transcriptional regulator
26112_135631_01195	tag	04UMT,08R3E,0NI4Y,COG2818	L	acetyltransferase
26112_135631_01281	group_2142	04XKX,05WF1,0NP85,COG3077	L	hypothetical protein
26112_135631_01407	rnhC	04SIY,07FSS,0NGIM,COG1039	L	translation initiation factor IF-1
26112_135631_01542	dnaX	04RH3,05C6E,0NE38,COG2812	L	50S ribosomal protein L19
26112_135631_01580	pcrA	04RRB,05C4R,0NDZU,COG0210	L	putative permease
26112_135631_01637	mmsA	04RVX,05CB5,0NDIH,COG1200	L	cytosolic protein
26112_135631_02087	ssbB	08UUM,0NI2T,COG0629	L	3-keto-L-gulonate-6-phosphate decarboxylase
26112_135631_00166	agaS	04TB5,05E70,0NEV7,COG2222	M	involved in transformation
26112_135631_00261	wcaJ_2	04UII,05D3Q,0NH9N,COG2148	M	oxidoreductase, pyridine nucleotide-disulfide class I, Mercury (II) reductase
26112_135631_00428	cotSA	04TKV,07QIT,0NGQK,COG0438	M	hypothetical protein
26112_135631_00429	licD3	04SRT,05KPE,0NEYK,COG3475	M	hypothetical protein
26112_135631_00451	murB	04RIG,05D4A,0NDUH,COG0812	M	alanyl-tRNA synthetase
26112_135631_00517	murA1	04R8Q,05CDF,0ND91,COG0766	M	spoU rRNA methylase family protein
26112_135631_00581	cotS	04UH1,08V15,0NI97,COG0510	M	translation initiation factor IF-2
26112_135631_00732	pbp1B	04SF6,05BZ4,0NDAH,COG0744	M	maltodextrin ABC transporter permease
26112_135631_00888	group_4418	04Z2D,05CFW,0NDNN,COG0510	M	flavoprotein involved in panthothenate metabolism
26112_135631_01031	ytgP	04RXA,05CKP,0NDHM,COG2244	M	acetolactate synthase large subunit
26112_135631_01093	capD	04R6Z,05C5E,0NDVC,COG1086	M	GIY-YIG domain-containing protein
26112_135631_01117	divIB	04W0P,08W8M,0NJ6X,COG1589	M	4-oxalocrotonate tautomerase
26112_135631_01119	murD	04R7M,05DMZ,0NE3U,COG0771	M	protein-(glutamine-N5) methyltransferase, release factor-specific
26112_135631_01355	mraY	04R7A,05CPY,0ND6M,COG0472	M	SSU ribosomal protein S17p (S11e)
26112_135631_01535	pbp3	04SXT,05DZ1,0NDFG,COG1686	M	heat shock protein HtpX
26112_135631_01586	murZ	04R8Q,05CDF,0ND91,COG0766	M	D-alanyl-D-alanine carboxypeptidase, penicillin-binding protein 3
26112_135631_01636	alr	04RS6,05CJ4,0ND8Q,COG0787	M	ribose-phosphate pyrophosphokinase
26112_135631_01659	pbp2B	04R6T,07RF6,0NDS6,COG0768	M	ATP-dependent DNA helicase PcrA
26112_135631_01931	lepA	04RB3,05C4S,0NEFC,COG0481	M	universal stress protein
26112_135631_00034	htrA	04RM3,05C0H,0NEX0,COG0265	O	trypsin-like serine protease
26112_135631_00354	dsbD_1	04TX9,07QIV,0NKVM,COG0785	O	trehalose operon repressor
26112_135631_00355	group_6869	04WAQ,05JFT,0NKGK,COG0526	O	ribonuclease BN
26112_135631_00356	msrAB	04TPR,05E0X,0NDW0,COG0225,COG0229	O	cytochrome c-type biogenesis protein
26112_135631_00424	mecA	04U94,08SQ7,0NI7C,COG4862	O	50S ribosomal protein L10
26112_135631_00508	act	04SJ0,05F1A,0NDHC,COG1180	O	ABC transporter ATP-binding protein
26112_135631_00696	group_6845	04RAH,05E1G,0NDXM,COG0330	O	16S ribosomal RNA methyltransferase RsmE
26112_135631_00841	group_3096	04UW2,05KJP,0P35J,COG0526	O	glycerophosphoryl diester phosphodiesterase family protein
26112_135631_00842	dsbD_2	04VTX,07WUU,0NH55,COG0785	O	bifunctional riboflavin kinase/FMN adenylyltransferase
26112_135631_01007	yghU	04TBU,05CYM,0NFE1,COG0625	O	peptidoglycan N-acetylglucosamine deacetylase A
26112_135631_01022	group_3116	04TVK,08R5K,0NHB5,COG0561,COG0652	O	hypothetical protein
26112_135631_01214	nrdG	04RDG,08RDD,0NICQ,COG0602	O	DNA mismatch repair protein hexB
26112_135631_01255	hpdA	04SJ0,05F1A,0NDHC,COG1180	O	cardiolipin synthase
26112_135631_01333	gpo	04U8Q,08V06,0NIF4,COG0386	O	30S ribosomal protein S19
26112_135631_01466	htpX	04S9G,05D0M,0NFCW,COG0501	O	response regulator
26112_135631_01684	pepO	04SM3,05C9K,0NDW8,COG3590	O	phosphoenolpyruvate carboxylase
26112_135631_01951	nrdH	04X0H,05WAZ,0NNFR,COG0695	O	hypothetical protein
26112_135631_02084	trxA_1	04VM0,05N2R,0NKNU,COG0526	O	L-ribulose 5-phosphate 4-epimerase
26112_135631_00243	dps	04UKW,05HUF,0NIFR,COG0783	P	cysteinyl-tRNA synthetase
26112_135631_00291	fepD_2	04RMM,05CM4,0NDGZ,COG4605	P	hypothetical protein
26112_135631_00293	yclQ	04S7S,05KVJ,0NG26,COG4607	P	glutamyl aminopeptidase
26112_135631_00456	phoU_2	04UCK,08UTW,0NIDS,COG0704	P	spermidine/putrescine ABC transporter permease
26112_135631_00721	malG	04SK3,05EG2,0NEE3,COG3833	P	hypothetical protein
26112_135631_00722	malF	04S1Z,05D56,0NDIX,COG1175	P	excreted peptide
26112_135631_00744	pstA_1	04S33,05E2Z,0NDYC,COG0581	P	tyrosine--tRNA ligase
26112_135631_00745	pstC_1	04RC3,05C8U,0ND6J,COG0573	P	penicillin-binding protein 1B
26112_135631_00862	glnP	04SIR,05E5Q,0NFFI,COG0765,COG0834	P	thioredoxin
26112_135631_01006	pacL	04RDJ,05C52,0NDFV,COG0474	P	2,5-diketo-D-gluconic acid reductase A
26112_135631_01103	ycjP_4	04SXV,05C50,0NEIZ,COG0395	P	dihydrodipicolinate synthase
26112_135631_01175	metQ	04S3H,05D01,0NE4D,COG1464	P	MurD D-glutamic acid adding enzyme
26112_135631_01177	metN	054TQ,08JEI,0P6JY,COG1135	P	integral membrane protein
26112_135631_01178	metP	04U2Q,08UMI,0NI7N,COG2011	P	tRNA pseudouridine synthase A
26112_135631_01199	corA	04TE9,07QWA,0ND5X,COG0598	P	ABC transporter ATP-binding protein
26112_135631_01682	psaC	04SX1,05CC5,0NF3Q,COG1108	P	metal-sulfur cluster biosynthesis protein
26112_135631_01974	group_3973	07TN3,0NEV9,COG0471	P	VanZ family protein
26112_135631_01990	ulaD	04S7M,05H6Q,0NFKG,COG0269	Q	PTS system lactose-specific transporter subunit IIA
26112_135631_00066	group_4917	04W1Q,05MJ2,0NM0Q,COG1040	S	competence stimulating peptide 2
26112_135631_00200	yeiH	04SVJ,05HMI,0NDGG,COG2855	S	phosphoribosylaminoimidazole-succinocarboxamide synthetase
26112_135631_00265	group_1466	04XK8,069VZ,0NT2P,0Y3NW	S	glycosyl transferase family protein
26112_135631_00294	yidD	04WFE,05VAS,0NNFM,COG0759	S	ferric iron ABC transporter membrane-spanning permease
26112_135631_00297	scpA	04U5D,08KVX,0NKX5,COG1354	S	ribosomal large subunit pseudouridine synthase B
26112_135631_00299	ykuL	COG0517	S	segregation and condensation protein B
26112_135631_00303	group_6782	COG3763	S	CBS domain-containing protein
26112_135631_00353	group_3380	04TW1,05DXZ,0NIA2,COG1295	S	alpha,alpha-phosphotrehalase
26112_135631_00366	group_6512	04XSM,06ADD,0NRQ3,0Y0YB	S	thioredoxin
26112_135631_00368	hflX	04S1V,05C1N,0NEK2,COG2262	S	peptide methionine sulfoxide reductase
26112_135631_00371	group_3773	04S04,08Y0Q,0NIBF,COG0300	S	putative uncharacterized protein ORF 3
26112_135631_00465	group_4978	04WH6,05WBI,0NP0S,COG4476	S	UDP-N-acetylmuramate dehydrogenase
26112_135631_00472	group_6602	04WG7,05ST1,0NKQW,COG4768	S	COG0647: sugar phosphatases of the HAD superfamily, N-acetyl-glucosamine catabolism protein
26112_135631_00519	endA	04W0Y,05ZT7,0NN3G,12175	S	aspartate-ammonia ligase
26112_135631_00579	rimP	04W5F,05K7D,0NJ53,COG0779	S	acetyltransferase, gnat family
26112_135631_00580	trmB	04SFT,05CZ1,0NFUR,COG0220	S	ribosome-binding factor A
26112_135631_00607	group_1264	065IW,0EWXU@cloNOG,0NPVJ,11ZMJ	S	SP14.3 protein
26112_135631_00618	rbgA	04R66,05C9W,0NDGU,COG1161	S	tRNA (guanine-N(7)-)-methyltransferase
26112_135631_00642	group_3809	05IZE,COG5255	S	GTP-binding protein
26112_135631_00664	group_6809	0531A,079CN,0NZAM,COG5547	S	Uncharacterized protein conserved in bacteria
26112_135631_00681	rsmE	04UBY,05QF0,0NI5A,COG1385	S	anthranilate synthase component II (glutamine amido-transferase)
26112_135631_00718	group_6557	04SSX,07AYK,0NDY9,COG1284	S	transketolase n-terminal section
26112_135631_00720	malA	04USI,08VP7,0NIXG,COG5521	S	transcriptional regulator
26112_135631_00737	gluP	04TE2,07ZXI,0NFG4,COG0705	S	hypothetical protein
26112_135631_00767	group_6722	04XZG,06E6V,0NS0A,COG4479	S	GlpG protein (membrane protein of glp regulon)
26112_135631_00823	group_4875	04SEM,08JYZ,0NF0C,COG1284	S	ABC transporter ATP-binding protein/permease
26112_135631_00824	group_3821	04TQ4,08RCR,0NHD7,COG1307	S	tRNA (uracil-5-)-methyltransferase Gid
26112_135631_00838	group_3824	04WNM,05VJB,0NNNN,COG5506	S	membrane protein
26112_135631_00845	group_4409	0527Q,05VEZ,0NYJ5,121PE	S	YpjC
26112_135631_00846	vicX	04RJ6,05Q2H,0NFC8,COG1235	S	DegV family protein
26112_135631_00876	group_2273	0546C,087RD,0P58S,COG3326	S	toxin-antitoxin system, antitoxin component, ribbon-helix-helix fold protein
26112_135631_00884	group_6560	04YW7,05TNC,0NFIE,COG1808	S	metallo-beta-lactamase superfamily protein
26112_135631_00914	cppA	074EB,0P0EA,0ZGK6	S	glutamine ABC transporter permease
26112_135631_00929	yqfA	04U4V,08UT2,0NI4I,COG1272	S	chromosome condensation and segregation SMC protein
26112_135631_00934	azr_2	04TAI,08YYH,0NN86,COG0431	S	membrane protein
26112_135631_00999	group_4429	COG4835	S	hlyIII superfamily protein
26112_135631_01000	group_4430	04RTQ,05EPR,0NETM,COG1307	S	NADPH-dependent FMN reductase domain-containing protein
26112_135631_01011	yaaA	04TQC,05D1Q,0NDWE,COG3022	S	transcriptional repressor of the glutamine synthetase gene
26112_135631_01043	ywnH	04WKC,05VEV,0NPK1,123JQ	S	transposase
26112_135631_01058	xylH	04XIK,069HH,0NR00,COG1942	S	cation transporter E1-E2 family ATPase
26112_135631_01091	group_2667	04X17,07XTA,0NQB4,COG0546	S	S-adenosylmethionine-dependent methyltransferase
26112_135631_01101	group_4445	04RP6,05C72,0NENW,COG1054	S	acetyltransferase
26112_135631_01122	hmpT	04W1Z,05PUK,0NMIA,COG4720	S	Sua5/YciO/YrdC family protein
26112_135631_01149	group_6664	04RGQ,05CN5,0NDNW,COG0595	S	rhodanese-related sulfurtransferase
26112_135631_01150	group_3130	04XH5,06EHS,0NR4J,COG5503	S	ABC transporter permease
26112_135631_01155	group_1504	04Y23,05KEG,0NKT3,COG0456	S	cell division septal protein
26112_135631_01198	group_3484	04W9K,05S93,0NNN8,COG4858	S	ABC transporter substrate-binding lipoprotein
26112_135631_01204	group_6677	04VJP,05VBH,0NNGH,COG4472	S	ABC transporter permease
26112_135631_01293	pbuO	04RG9,05C7N,0NDD3,COG2252	S	50S ribosomal protein L4
26112_135631_01434	group_6865	04VYI,08ZSR,0NJGN,COG1302	S	xanthine/uracil permease family protein
26112_135631_01453	group_4483	04W0I,05WUC,0NNR7,COG4471	S	UDP-phosphate-UDP-MurNAc-pentapeptide phospho-MurNAc-pentapeptide transferase
26112_135631_01502	group_4490	04TC3,08PJD,0NGER,COG0701	S	glutamyl-tRNA(Gln) amidotransferase, A subunit
26112_135631_01503	group_6713	04TAM,08NNR,0NETV,COG3689	S	peptide chain release factor 2
26112_135631_01534	yhhT_2	04RKU,05C02,0NEF8,COG0628	S	glycosyl hydrolase
26112_135631_01575	group_5024	04WHM,05XTE,0NP1D,122BZ	S	hypothetical protein
26112_135631_01594	group_6842	04VS0,05VG1,0NKW7,COG2151	S	membrane protein
26112_135631_01695	group_3517	04UNK,05EU1,0NIZE,0XSVF	S	GntR family transcriptional regulator
26112_135631_01717	frmB	04VFY,07UWA,0NN32,COG0627	S	phospho-2-dehydro-3-deoxyheptonate aldolase, (DAHP synthetase isozyme)-possibly phe sensitive
26112_135631_01829	ykoE	04V2U,05NSK,0NKEN,COG4721	S	peptidase M13 superfamily
26112_135631_01859	group_4539	04XI1,0680X,0NR5I,0XV2U	S	nitroreductase
26112_135631_01863	gph	052MT,05PY5,0P23N,COG0546	S	purine nucleoside phosphorylase
26112_135631_01901	yutD	04WKY,05MMD,0NKUU,COG4470	S	thiamine-phosphate pyrophosphorylase
26112_135631_01982	group_4558	051T1,06DR7,0NR40,COG4642	S	GTP-binding protein LepA
26112_135631_02013	group_3980	04W59,05KGY,0NIXR,COG5523	S	nicotinate-nucleotide pyrophosphorylase
26112_135631_02079	group_4570	04UXW,08YY0,0NIJJ,COG4898	S	morn motif family protein
26112_135631_02082	group_2728	04W07,05G4S,0NJJY,11V5T	S	preprotein translocase subunit
26112_135631_00037	comC		S	ascorbate-specific phosphotransferase enzyme iib component (ascorbate-specific pts system eiib component)
26112_135631_00287	group_2265		S	acetate kinase
26112_135631_00536	group_4367		S	competence protein ComGC
26112_135631_00597	group_2636		S	alcohol dehydrogenase
26112_135631_00711	group_3088		S	queuine tRNA-ribosyltransferase
26112_135631_00715	group_3425		S	putative integral membrane protein
26112_135631_00810	group_6668		S	gamma-glutamylcysteine synthetase putative
26112_135631_00812	group_4989		S	membrane protein
26112_135631_00922	group_6736		S	hypothetical protein
26112_135631_00988	group_3461		S	glucose-1-phosphate adenylyl transferase
26112_135631_01210	group_2888		S	Lin0147
26112_135631_01541	group_6878		S	transcriptional regulator
26112_135631_01757	group_1728		S	putative uncharacterized conserved secreted protein
26112_135631_01889	group_3539		S	FIG014356: hypothetical protein
26112_135631_01922	group_3542		S	thioredoxin family protein
26112_135631_02083	group_3564		S	single-strand DNA-binding protein B
26112_135631_00474	hprK	04RGD,05D1C,0NDXR,COG1493	T	acyl-ACP thioesterase
26112_135631_01388	cbpJ_2	COG0745	T	50S ribosomal protein L18
26112_135631_01400	vraR_2	04U3Q,05WH1,0NH6X,COG2197	T	adenylate kinase
26112_135631_01847	group_6635	04UZX,07YZX,0NJD7,COG0589	T	ABC transporter permease
26112_135631_01869	ciaH	04U40,05US7,0NERQ,COG0642	T	pantothenate kinase
26112_135631_01870	ciaR	04U65,08STX,0NHNV,COG0745	T	membrane protein (pseudogene)
26112_135631_01983	yfkJ	04UZJ,07ZCW,0NJI4,COG0394	T	galactose-6-phosphate isomerase subunit LacA
26112_135631_01632	secA	04RY2,05CI6,0NDGV,COG0653	U	3-carboxymuconate cyclase
26112_135631_01984	group_4559	04WHG,05VIE,0NNHR,COG1862	U	galactose-6-phosphate isomerase subunit LacB
26112_135631_02005	cglC	04XQU,06855,0NR3I,0XUCS	U	nrdH-redoxin
26112_135631_00180	group_3053	04XIR,067X5,0NQY1,COG4767	V	bifunctional phosphoribosylaminoimidazolecarboxamide formyltransferase/IMP cyclohydrolase
26112_135631_00498	macB_1	04UXN,08ZME,0NJTM,COG1136	V	6-phosphogluconolactonase/Glucosamine-6- phosphate isomerase/deaminase
26112_135631_00754	yheI_2	04RXV,05BZ1,0NDFU,COG1132	V	drug/metabolite transporter (DMT) superfamily permease
26112_135631_01617	ecsA_2	04U9G,05DVE,0NDPA,COG1131	V	elongation factor Tu
26112_135631_01704	vexp1	04T2H,07WD8,0NGRT,COG0577	V	preprotein translocase subunit SecA
26112_135631_01854	group_1636	04VBA,05KCT,0NJS6,COG0842	V	amino acid ABC transporter amino acid-binding protein
26112_135631_01899	group_2954	COG4767	V	cobalt ABC transporter permease
26112_135631_01972	group_3547	08SUZ,11HIW	V	tRNA (guanine-N(1)-)-methyltransferase
26112_135631_00425	group_4348	04TWA,08SEM,0NHZF,11FS9	S	N-ethylammeline chlorohydrolase
26112_135631_00426	group_4856	04T9I,06GVQ,0NGS3,0ZFM3	S	adaptor protein
26112_135631_00665	group_4384	04XBA,067G5,0NQTZ,12AWZ	S	anthranilate synthase component I
26112_135631_00695	group_6808	04WK5,05W0D,0NNGJ,COG4877	S	membrane protein
26112_135631_00709	group_2450	06H7B,0NRZP,0Y41D	S	hypothetical protein
26112_135631_00729	group_4392	04XG4,06460,0NQUS,121RH	S	malA-protein
26112_135631_00854	niaX	04WDQ,05RNB,0NM2R,11YD9	S	FIG01114091: hypothetical protein
26112_135631_00978	group_2659	050YW,06UGH,0NWRQ,0YS1C	S	carbamoyl-phosphate synthase, large subunit
26112_135631_01386	group_2803	051Y7,070VT,0NWX7,0YUH9	S	30S ribosomal protein S14
26112_135631_01505	group_2304	0512J,05ZKR,0NPCA,12840	S	UPF0298 protein SSU98
26112_135631_02071	group_3559	052XH,0614H,0NRHJ,12399	S	PTS system transporter subunit IIB
26112_135631_02073	group_3982	04YAH,06BRH,0NSYB,0Y6AG	S	PTS system transporter subunit IIA
