# Supplementary material for: Genomic Analyses of >3,100 Nasopharyngeal Pneumococci Revealed Significant Differences Between Pneumococci Recovered in Four Different Geographical Regions
Source: Front Microbiol. 2019 Feb 25;10:317. doi: 10.3389/fmicb.2019.00317 (PMC6398412; doi:10.3389/fmicb.2019.00317)
Supplement: TABLE S5 — Associations between clonal complexes as defined by MLST and sequence clusters as defined by hierBAPS, stratified by geographical location. [file Table_5.XLSX]

## Sheet: supplemental table S5
Supplemental Table 5. Associations between clonal complexes as defined by MLST and sequence clusters as defined by BAPS, stratified by geographical locations.
		BAPS sequence cluster
Clonal complex	Location	1	2	3	4	5	6	7	8	9	10	11	12	13	14	15	16	17	18	19	20	21	22	23	24	unassigned	Total
138/176	Boston									8									5								13
	Maela																		4								4
	Reykjavik									85																	85
	Southampton									43																	43
15	Boston																									13	13
	Maela										74															22	96
	Reykjavik																									14	14
	Southampton																									8	8
156/162	Boston																	15									15
	Maela									7								7									14
	Reykjavik																	17									17
	Southampton																	12									12
448	Boston																					7					7
	Maela																					15					15
	Reykjavik																					28					28
	Southampton																					2					2
344	Boston																				3						3
	Maela																									1	1
	Reykjavik																				33					1	34
	Southampton																				3						3
338	Boston																		13								13
	Maela																		21								21
	Reykjavik																		2								2
	Southampton																		1								1
393	Boston															9											9
	Maela															3											3
	Reykjavik															16											16
	Southampton															9											9
113	Boston																									3	3
	Maela																									2	2
	Reykjavik																									15	15
	Southampton																									6	6
199	Boston				98																						98
	Reykjavik				110																						110
	Southampton				52																						52
439	Boston		56																								56
	Reykjavik		127																								127
	Southampton		61																								61
460	Boston																52										52
	Reykjavik																48										48
	Southampton																59										59
62	Boston					48																					48
	Reykjavik					65															1						66
	Southampton					44																					44
180	Boston							11																			11
	Reykjavik							55																			55
	Southampton							8																			8
433	Boston													21													21
	Reykjavik													31													31
	Southampton													17													17
395	Boston											2														7	9
	Reykjavik											12														8	20
	Southampton											38															38
392	Boston														4												4
	Reykjavik														32												32
	Southampton														9												9
124	Boston																									7	7
	Reykjavik																									30	30
	Southampton																									5	5
30	Boston															1											1
	Reykjavik															20											20
	Southampton															10											10
100	Boston					5																					5
	Reykjavik					10																					10
	Southampton					9																					9
473	Boston																									15	15
	Reykjavik																									1	1
	Southampton																									5	5
1379	Boston																									11	11
	Reykjavik																									3	3
	Southampton																									3	3
66	Boston	2																									2
	Reykjavik	10																									10
	Southampton	5																									5
432	Boston																									1	1
	Reykjavik																									5	5
	Southampton																									8	8
452	Boston																									3	3
	Reykjavik																									2	2
	Southampton																									4	4
568	Boston																									4	4
	Reykjavik																									1	1
	Southampton																									1	1
236/271/320	Boston																							25			25
	Maela																							122			122
	Reykjavik																							53			53
315	Boston												1														1
	Maela												31														31
	Reykjavik												5														5
90	Boston						1																				1
	Maela						10																				10
	Reykjavik						9																				9
171	Boston									1									1								2
	Maela																		11								11
	Reykjavik									2																	2
63	Boston			25																							25
	Maela			41																							41
	Southampton			7																							7
230	Boston	2																									2
	Maela	35																									35
	Southampton	1																									1
81	Boston	3																									3
	Maela	12																									12
	Southampton	1																									1
218	Boston																									3	3
	Maela																									3	3
	Southampton																									1	1
242	Boston																									3	3
	Maela																									2	2
	Southampton																									1	1
193	Reykjavik																									16	16
	Southampton																									21	21
1262	Reykjavik																									21	21
	Southampton																									8	8
385	Maela						20																				20
	Southampton						1																				1
1390	Boston																									15	15
	Southampton																									1	1
191	Boston																									10	10
	Southampton																									5	5
1797	Boston																									2	2
	Southampton																									1	1
1340	Boston																									1	1
	Southampton																									1	1
198	Reykjavik																									11	11
	Southampton																									1	1
177	Reykjavik																									5	5
	Southampton																									6	6
396	Reykjavik																									4	4
	Southampton																									2	2
205	Reykjavik																									1	1
	Southampton																									1	1
1816	Maela																									4	4
	Reykjavik																									4	4
447	Boston																									2	2
	Maela																									4	4
346	Boston																									1	1
	Reykjavik																									1	1
558	Boston																						45				45
2090	Boston																									11	11
247	Boston																									8	8
659	Boston																									6	6
251	Boston																									4	4
146	Boston						4																				4
690	Boston																									4	4
1106	Boston																									2	2
496	Boston					2																					2
5902	Boston																									1	1
383	Boston																									1	1
1536	Boston						1																				1
1902/7412	Boston																									1	1
1934/10505	Boston																									1	1
745/1939	Boston																									1	1
415	Boston																									1	1
802	Maela																			61							61
4209	Maela																								39		39
4391	Maela								25																		25
3735	Maela																									22	22
6692	Maela																									22	22
6011	Maela																									21	21
4136	Maela																									17	17
99	Maela																									16	16
4420	Maela																									16	16
982	Maela																									15	15
6767	Maela																									12	12
4113	Maela																									11	11
5115	Maela																									10	10
1961/6440	Maela																									9	9
870	Maela																									9	9
5099	Maela																									8	8
6694	Maela																									8	8
4399	Maela																									8	8
5477	Maela																		7								7
5873	Maela																									6	6
901	Maela																									6	6
4134/4421	Maela								6																		6
4935	Maela																									6	6
10588	Maela																									5	5
910	Maela																									5	5
4955	Maela																									5	5
4142	Maela								4																		4
2572	Maela																		4								4
3545/5265	Maela																									4	4
4415	Maela																									4	4
6710/10470	Maela																									4	4
5103	Maela																									4	4
280	Maela																									3	3
4130	Maela																									3	3
4411	Maela																									3	3
289	Maela																									3	3
217	Maela																									3	3
10367	Maela																									3	3
989	Maela																									3	3
1684	Maela																									3	3
3751	Maela																									2	2
5266	Maela																									2	2
7747/10494	Maela																									2	2
6702/10383	Maela																									2	2
7067	Maela																									2	2
4129/6687	Maela																									2	2
5095/7656	Maela																									2	2
6707/10567	Maela																									2	2
4412/10326	Maela								1																		1
2758	Maela																									1	1
4146/4409	Maela																									1	1
3500	Maela																									1	1
4451/10566	Maela																									1	1
6557	Maela																									1	1
241	Maela																									1	1
2912	Maela																									1	1
3983	Maela																									1	1
2528	Maela																									1	1
458	Maela																									1	1
4410/8013	Maela																									1	1
1765/8799	Maela																									1	1
4452/10498	Maela																									1	1
6012	Maela																									1	1
574	Maela																									1	1
2991	Maela																									1	1
490	Reykjavik						46																				46
11350	Reykjavik																									7	7
3017	Reykjavik				2																						2
102	Reykjavik																									2	2
717	Reykjavik					1																					1
698	Southampton																									10	10
58	Southampton																									4	4
235	Southampton																									2	2
476	Southampton																									2	2
172	Southampton																		2								2
8709	Southampton																									2	2
1884	Southampton																									2	2
306	Southampton																									2	2
482/2653	Southampton																									1	1
8918	Southampton																									1	1
4423/11172	Southampton																									1	1
309	Southampton																									1	1
3460/4337	Southampton																									1	1
Singletons	all				1		4		9		2								1		1		1			95	114
Grand Total	all	71	244	73	263	184	96	74	45	146	76	52	37	69	45	68	159	51	72	61	41	52	46	200	39	854	3118
